# Supplementary material for: Isolation and Characterization of Galloylglucoses Effective against Multidrug-Resistant Strains of Escherichia coli and Klebsiella pneumoniae
Source: MDPI journal article supplement (doi:10.3390/molecules27155045), 2022-08-08
Supplement: s1 [file s1]

## Supporting information for:

### Isolation and Characterization of Galloylglucoses Effective against Multidrug-Resistant Strains of *Escherichia coli* and *Klebsiella pneumoniae*.

Nelson E. Masota<sup>1,2</sup>, Knut Ohlsen<sup>3</sup>, Curd Schollmayer<sup>1</sup>, Lorenz Meinel<sup>1</sup> and Ulrike Holzgrabe<sup>\*1</sup>

<sup>1</sup>Institute of Pharmacy and Food Chemistry, University of Wuerzburg, Wuerzburg Germany.

<sup>2</sup>School of Pharmacy, Muhimbili University of Health and Allied Sciences, Dar es Salaam, Tanzania.

<sup>3</sup>Institute for Molecular Infection Biology, University of Wuerzburg, Wuerzburg Germany

## List of Tables and Figures

|                                                                                                                                                                                                                                                      |    |
|------------------------------------------------------------------------------------------------------------------------------------------------------------------------------------------------------------------------------------------------------|----|
| <b>Table S1:</b> Summary of preparative HPLC parameters for isolation and purification of subfractions/compounds from the purified water fraction. ....                                                                                              | 4  |
| <b>Figure S1:</b> UV chromatogram subfraction D .....                                                                                                                                                                                                | 5  |
| <b>Figure S2:</b> UV chromatogram of subfraction E.....                                                                                                                                                                                              | 5  |
| <b>Figure S3:</b> Infrared spectrum of 1,2,3,4,6-penta-O-galloyl- $\beta$ -D-glucose (NMA2).....                                                                                                                                                     | 6  |
| <b>Figure S4:</b> Infrared spectrum of 3-O-digalloyl-1,2,4,6-tetra-O-galloyl- $\beta$ -D-glucose (NMB4) .....                                                                                                                                        | 6  |
| <b>Figure S4:</b> Infrared spectrum of 6-O-digalloyl-1,2,3,4-tetra-O-galloyl- $\beta$ -D-glucose (NMB6) .....                                                                                                                                        | 7  |
| <b>Figure S6:</b> Infrared spectrum of 3,6-bis-O-digalloyl-1,2,4-tri-O-galloyl- $\beta$ -D-glucose (NMC3).....                                                                                                                                       | 7  |
| <b>Figure S8:</b> HR-ESI-MS spectra of 3-O-digalloyl-1,2,4,6-tetra-O-galloyl- $\beta$ -D-glucose (NMB4) showing the full mass spectrum (A), zoom in of the major peak region (B) and simulated spectrum for the shown molecular formula (C). ....    | 8  |
| <b>Figure S9:</b> HR-ESI-MS spectra of 6-O-digalloyl-1,2,3,4-tetra-O-galloyl- $\beta$ -D-glucose (NMB6) showing the full mass spectrum (A), zoom in of the major peak region (B) and simulated spectrum for the shown molecular formula (C). ....    | 9  |
| <b>Figure S10:</b> HR-ESI-MS spectra of 3,6-bis-O-digalloyl-1,2,4-tri-O-galloyl- $\beta$ -D-glucose (NMC3) showing the full mass spectrum (A), zoom in of the major peak region (B) and simulated spectrum for the shown molecular formula (C). .... | 9  |
| <b>Figure S11:</b> <sup>1</sup> H spectrum of 1,2,3,4,6-penta-O-galloyl- $\beta$ -D-glucose (NMA2).....                                                                                                                                              | 10 |
| <b>Figure S12:</b> <sup>13</sup> C spectrum of 1,2,3,4,6-penta-O-galloyl- $\beta$ -D-glucose (NMA2) .....                                                                                                                                            | 10 |
| <b>Figure S13:</b> DEPT- 135 spectrum of 1,2,3,4,6-penta-O-galloyl- $\beta$ -D-glucose (NMA2) .....                                                                                                                                                  | 11 |
| <b>Figure S14:</b> COSY spectrum of 1,2,3,4,6-penta-O-galloyl- $\beta$ -D-glucose (NMA2).....                                                                                                                                                        | 11 |

|                                                                                                                                              |    |
|----------------------------------------------------------------------------------------------------------------------------------------------|----|
| <b>Figure S15:</b> HSQC spectrum of 1,2,3,4,6-penta-O-galloyl- $\beta$ -D-glucose (NMA2).....                                                | 12 |
| <b>Figure S16:</b> Zoom in of the aromatic aromatic region of HSQC spectrum of 1,2,3,4,6-penta-O-galloyl- $\beta$ -D-glucose (NMA2).....     | 12 |
| <b>Figure S17:</b> HMBC spectrum of 1,2,3,4,6-penta-O-galloyl- $\beta$ -D-glucose (NMA2).....                                                | 13 |
| <b>Figure S18:</b> Zoom in of the aromatic region of HMBC spectrum of 1,2,3,4,6-penta-O-galloyl- $\beta$ -D-glucose (NMA2) .....             | 13 |
| <b>Figure S19:</b> $^1\text{H}$ spectrum of 3-O-digalloyl-1,2,4,6-tetra-O-galloyl- $\beta$ -D-glucose (NMB4) .....                           | 14 |
| <b>Figure S20:</b> $^{13}\text{C}$ spectrum of 3-O-digalloyl-1,2,4,6-tetra-O-galloyl- $\beta$ -D-glucose (NMB4) .....                        | 14 |
| <b>Figure S21:</b> DEPT-135 of 3-O-digalloyl-1,2,4,6-tetra-O-galloyl- $\beta$ -D-glucose (NMB4) .....                                        | 15 |
| <b>Figure S22:</b> COSY Spectrum of 3-O-digalloyl-1,2,4,6-tetra-O-galloyl- $\beta$ -D-glucose (NMB4) .....                                   | 15 |
| <b>Figure S23:</b> HSQC spectrum of 3-O-digalloyl-1,2,4,6-tetra-O-galloyl- $\beta$ -D-glucose (NMB4) .....                                   | 16 |
| <b>Figure S24:</b> Zoom in of the aromatic region of HSQC spectrum of 3-O-digalloyl-1,2,4,6-tetra-O-galloyl- $\beta$ -D-glucose (NMB4).....  | 16 |
| <b>Figure S25:</b> HMBC spectrum of 3-O-digalloyl-1,2,4,6-tetra-O-galloyl- $\beta$ -D-glucose (NMB4) .....                                   | 17 |
| <b>Figure S26:</b> Zoom in of the aromatic region of HMBC spectrum of 3-O-digalloyl-1,2,4,6-tetra-O-galloyl- $\beta$ -D-glucose (NMB4) ..... | 17 |
| <b>Figure S27:</b> $^1\text{H}$ spectrum of 6-O-digalloyl-1,2,3,4-tetra-O-galloyl- $\beta$ -D-glucose (NMB6) .....                           | 18 |
| <b>Figure S28:</b> $^{13}\text{C}$ spectrum of 6-O-digalloyl-1,2,3,4-tetra-O-galloyl- $\beta$ -D-glucose (NMB6) .....                        | 18 |
| <b>Figure S29:</b> DEPT135 spectrum of 6-O-digalloyl-1,2,3,4-tetra-O-galloyl- $\beta$ -D-glucose (NMB6) .....                                | 19 |
| <b>Figure S30:</b> COSY spectrum of 6-O-digalloyl-1,2,3,4-tetra-O-galloyl- $\beta$ -D-glucose (NMB6) .....                                   | 19 |
| <b>Figure S31:</b> HSQC spectrum of 6-O-digalloyl-1,2,3,4-tetra-O-galloyl- $\beta$ -D-glucose (NMB6) .....                                   | 20 |
| <b>Figure S32:</b> Zoom in of the aromatic region of HSQC spectrum of 6-O-digalloyl-1,2,3,4-tetra-O-galloyl- $\beta$ -D-glucose (NMB6) ..... | 20 |
| <b>Figure S33:</b> HMBC spectrum of 6-O-digalloyl-1,2,3,4-tetra-O-galloyl- $\beta$ -D-glucose (NMB6) .....                                   | 21 |
| <b>Fig S34:</b> Zoom in of the aromatic region of HMBC spectrum of 6-O-digalloyl-1,2,3,4-tetra-O-galloyl- $\beta$ -D-glucose (NMB6) .....    | 21 |
| <b>Figure S35:</b> $^1\text{H}$ spectrum of 3,6-bis-O-digalloyl-1,2,4-tri-O-galloyl- $\beta$ -D-glucose (NMC3).....                          | 22 |

|                                                                                                                                                 |    |
|-------------------------------------------------------------------------------------------------------------------------------------------------|----|
| <b>Figure S36:</b> $^{13}\text{C}$ spectrum of 3,6-bis-O-digalloyl-1,2,4-tri-O-galloyl- $\beta$ -D-glucose (NMC3).....                          | 22 |
| <b>Figure S37:</b> DEPT-135 spectrum of 3,6-bis-O-digalloyl-1,2,4-tri-O-galloyl- $\beta$ -D-glucose (NMC3).....                                 | 23 |
| <b>Figure S38:</b> COSY spectrum of 3,6-bis-O-digalloyl-1,2,4-tri-O-galloyl- $\beta$ -D-glucose (NMC3).....                                     | 23 |
| <b>Figure S39:</b> HSQC spectrum of 3,6-bis-O-digalloyl-1,2,4-tri-O-galloyl- $\beta$ -D-glucose (NMC3).....                                     | 24 |
| <b>Figure S40:</b> Zoom in of the aromatic region of the HSQC spectrum of 6-O-digalloyl-1,2,3,4-tetra-O-galloyl- $\beta$ -D-glucose (NMB6)..... | 24 |
| <b>Figure S41:</b> HMBC spectrum of 3,6-bis-O-digalloyl-1,2,4-tri-O-galloyl- $\beta$ -D-glucose (NMC3).....                                     | 25 |
| <b>Figure S42:</b> Zoom in of the aromatic region of HMBC spectrum of 3,6-bis-O-digalloyl-1,2,4-tri-O-galloyl- $\beta$ -D-glucose (NMC3).....   | 25 |

**Table S1:** Summary of preparative HPLC parameters for isolation and purification of subfractions/compounds from the purified water fraction.

| Fraction to be Refined  | Stationary phase                                                              | Mobile phase composition as %v/v of acetonitrile in water and other chromatographic conditions. (UV detection wavelength = 254 nm)                                                                                                  | Recovered subfractions/ compounds                               |
|-------------------------|-------------------------------------------------------------------------------|-------------------------------------------------------------------------------------------------------------------------------------------------------------------------------------------------------------------------------------|-----------------------------------------------------------------|
| Purified water fraction | ZORBAX XDB-C18, 21.2 x 150 mm, 5 $\mu$ m (Agilent, US)                        | 20 – 20% (0 – 3 min), 20 – 45% (3 – 32 min), 45 – 45% (32 – 33 min), 45 – 95% (33 – 35 min), 95 – 95% (35 – 36 min), 95 – 20% (36 – 38 min).<br><br>Sample conc. = 250 mg/ mL, injection volume = 50 $\mu$ L, Flow rate = 4 ml/min. | pooled first minor fractions, and major fractions A, B, C, D, E |
| A                       |                                                                               | 20 – 20% (0 – 29 min), 20 – 50% (29 – 32 min), 50 – 50% (32 – 34 min), 50 – 20% (34 – 36 min), 20 – 20% (36 – 40 min).<br><br>Sample conc. = 100 mg/ mL, injection volume = 100 $\mu$ L, Flow rate = 4 ml/min.                      | A1, A2                                                          |
| B                       |                                                                               | 0 – 20% (0 – 32 min), 20 – 75% (32 – 35 min), 75 – 75% (35 – 38 min), 75 – 20% (38 – 41 min), 20 – 20% (41 – 44 min).<br><br>Sample conc. = 22.5 mg/ mL, injection volume = 8 $\mu$ L, Flow rate = 6 ml/min.                        | B1, B2, B3, B4&5, B6                                            |
| C                       |                                                                               | 5 – 5 % (0 – 5 min), 5 – 26% (5 – 7 min), 26 – 26% (7 – 27 min), 26 – 5% (27 – 29 min), 5 – 5% (29 – 31 min).<br><br>Sample conc. = 100 mg/ mL, injection volume = 20 $\mu$ L, Flow rate = 4 ml/min.                                | C1, C2, C3                                                      |
| D                       |                                                                               | 31 – 31% (0 – 32 min)<br><br>Sample conc. = 100 mg/ mL, injection volume = 20 $\mu$ L, Flow rate = 2 ml/min.                                                                                                                        | D1, D2, D3&4                                                    |
| E                       |                                                                               | 31 – 31% (0 – 35 min)<br><br>Sample conc. = 100 mg/ mL, injection volume = 35 $\mu$ L, Flow rate = 2 ml/min.                                                                                                                        | E1, E2, E3&4, E5                                                |
| B4&5                    | ZORBAX Eclipse XDB-18, Semi-Preparative 9.4 x 250 mm, 5 $\mu$ m (Agilent, US) | 0 – 17.5% (0 – 34 min), 17.5 – 75% (34 – 37 min), 75 – 75% (37 – 41 min), 75 – 17.5% (41 – 43 min), 17.5 – 17.5 % (29 – 31 min).<br><br>Sample conc. = 13.5 mg/ mL, injection volume = 50 $\mu$ L, Flow rate = 4 ml/min.            | B4, B5                                                          |

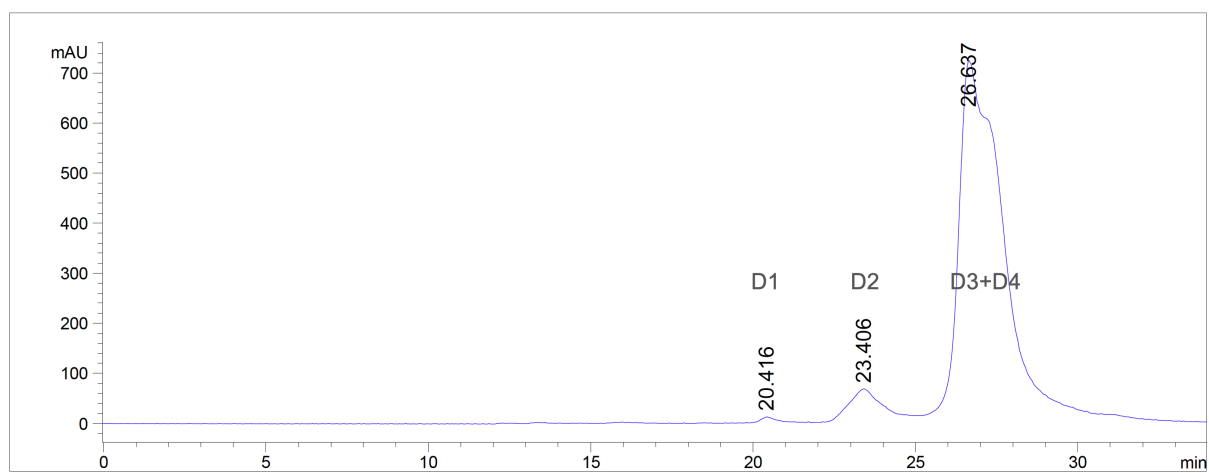

**Figure S1:** UV chromatogram subfraction D

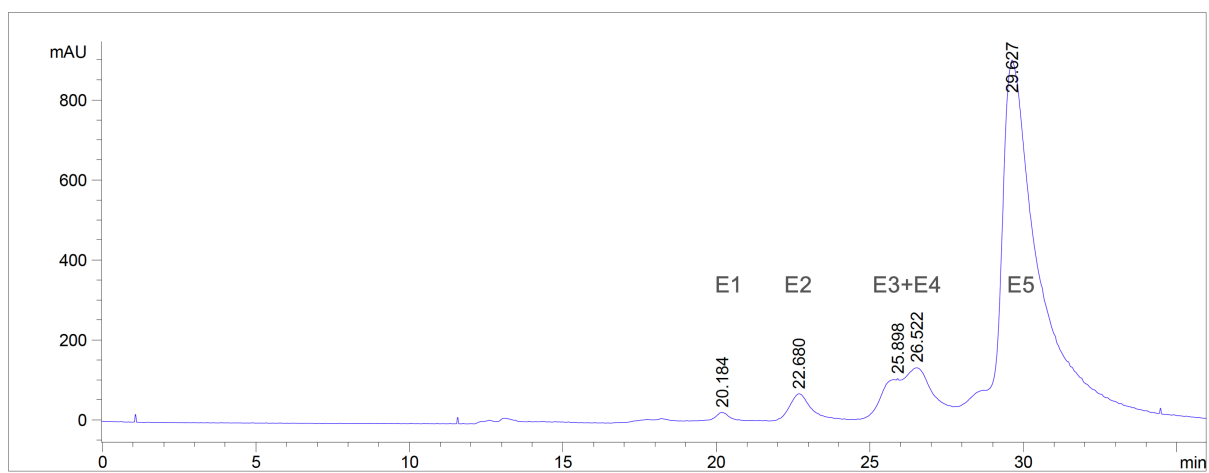

**Figure S2:** UV chromatogram of subfraction E

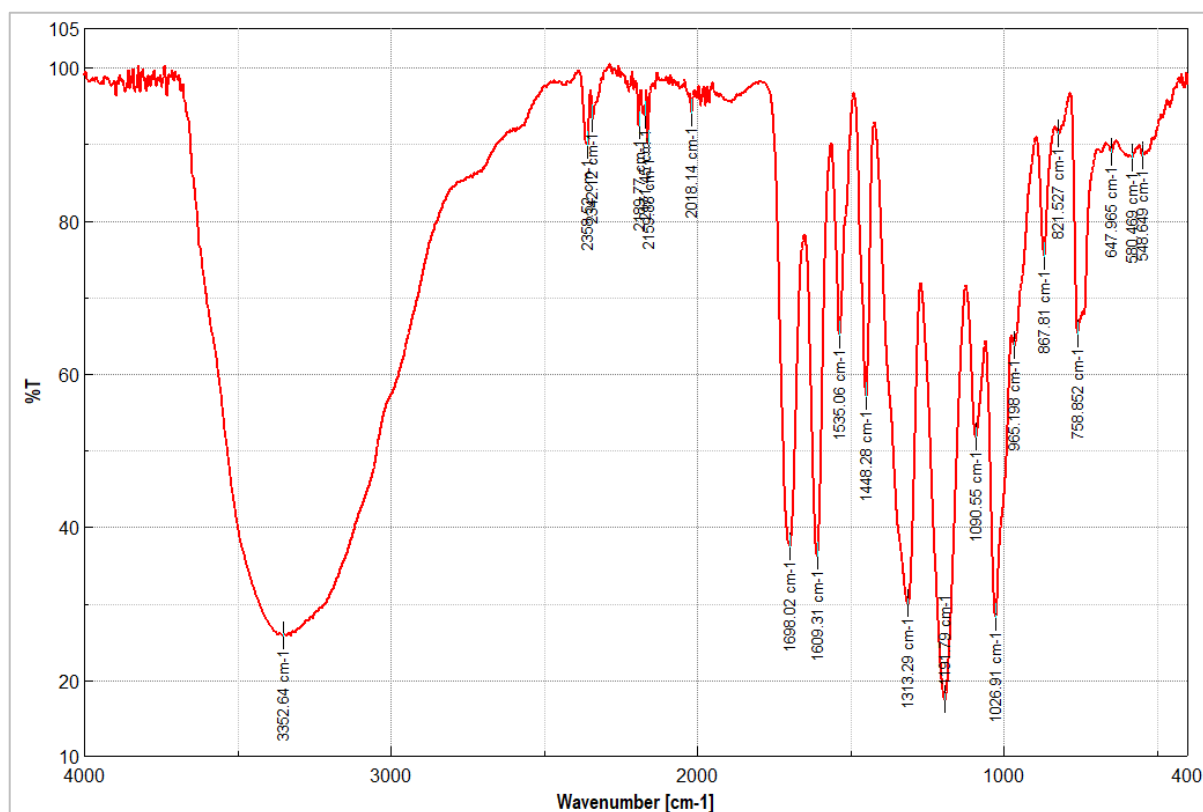

**Figure S3:** Infrared spectrum of 1,2,3,4,6-penta-O-galloyl-β-D-glucose (NMA2)

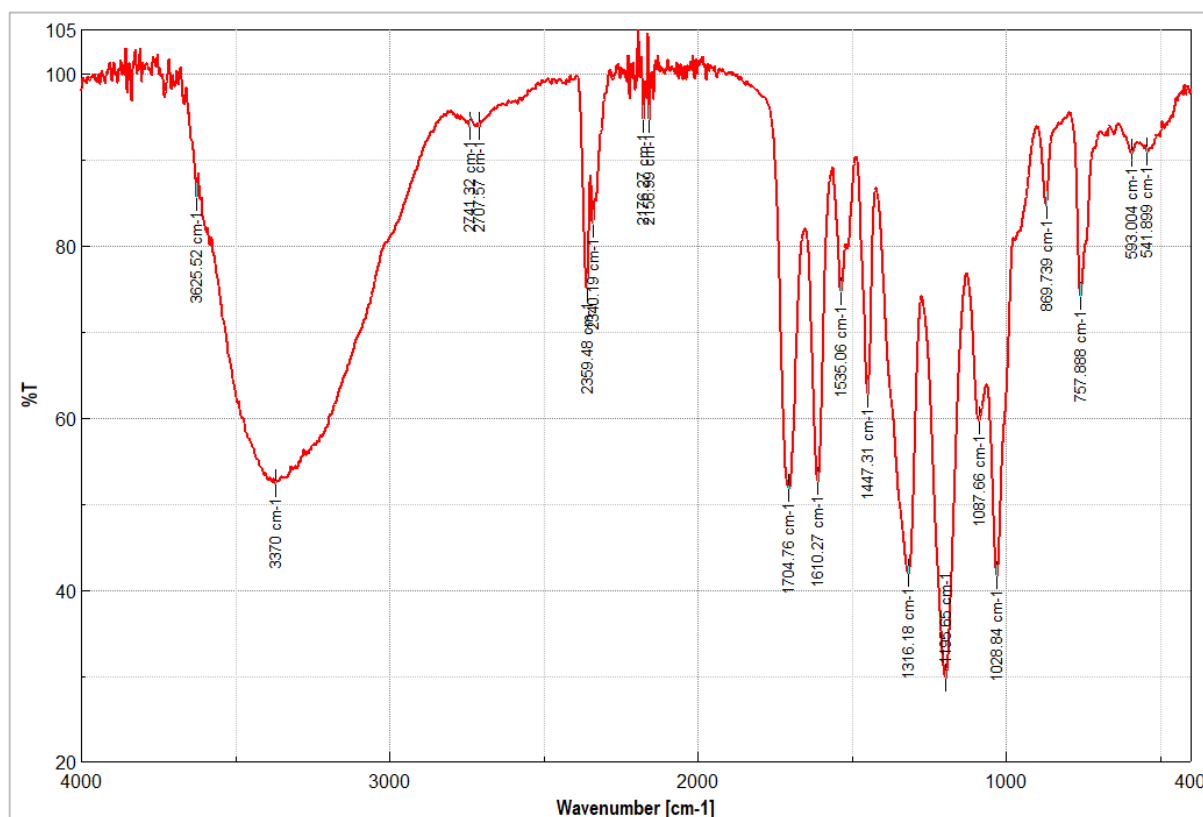

**Figure S4:** Infrared spectrum of 3-O-digalloyl-1,2,4,6-tetra-O-galloyl-β-D-glucose (NMB4)

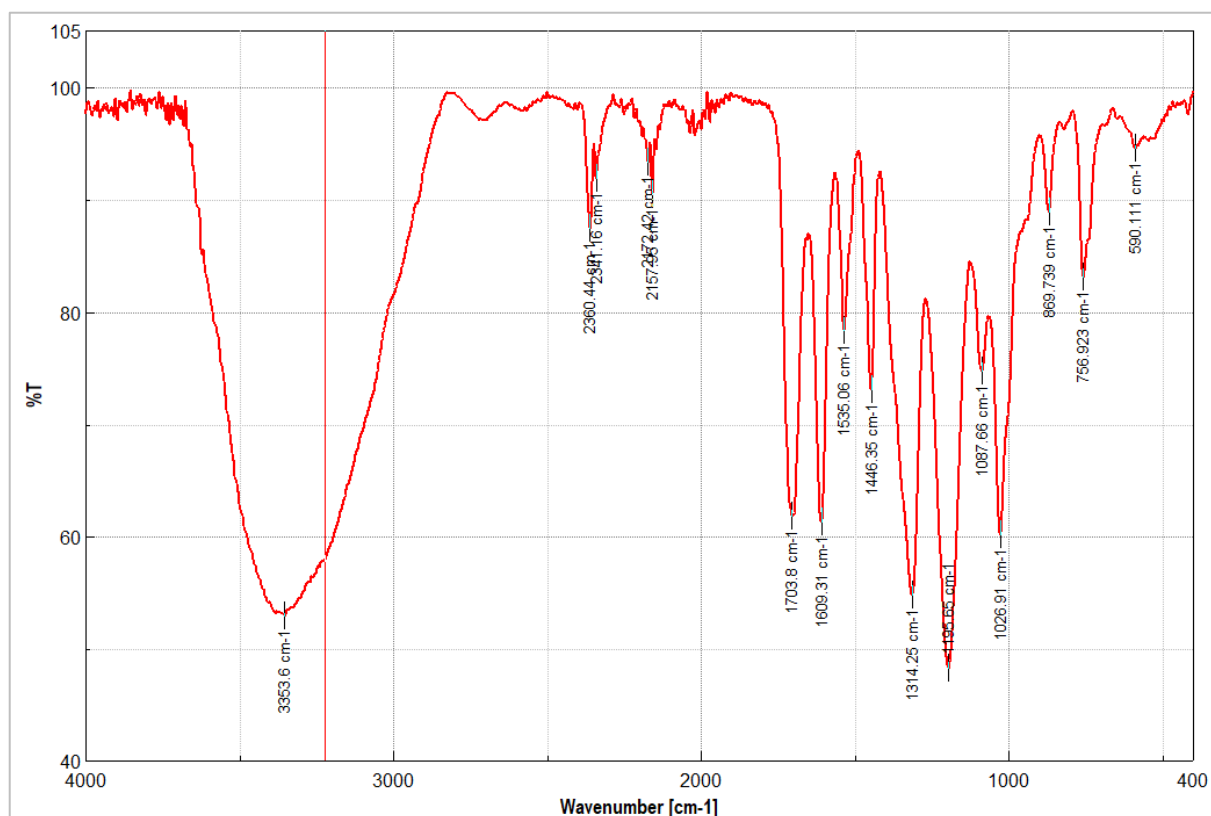

**Figure S4:** Infrared spectrum of 6-O-digalloyl-1,2,3,4-tetra-O-galloyl-β-D-glucose (NMB6)

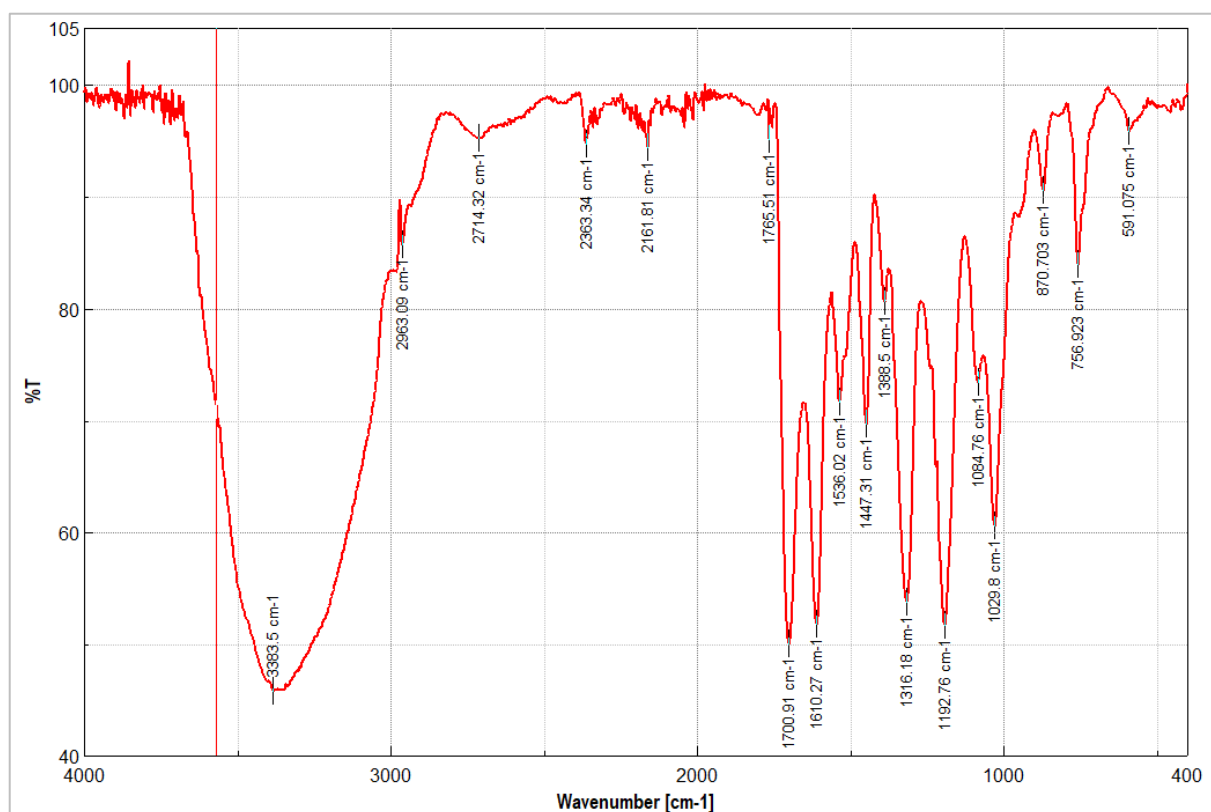

**Figure S6:** Infrared spectrum of 3,6-bis-O-digalloyl-1,2,4-tri-O-galloyl-β-D-glucose (NMC3)

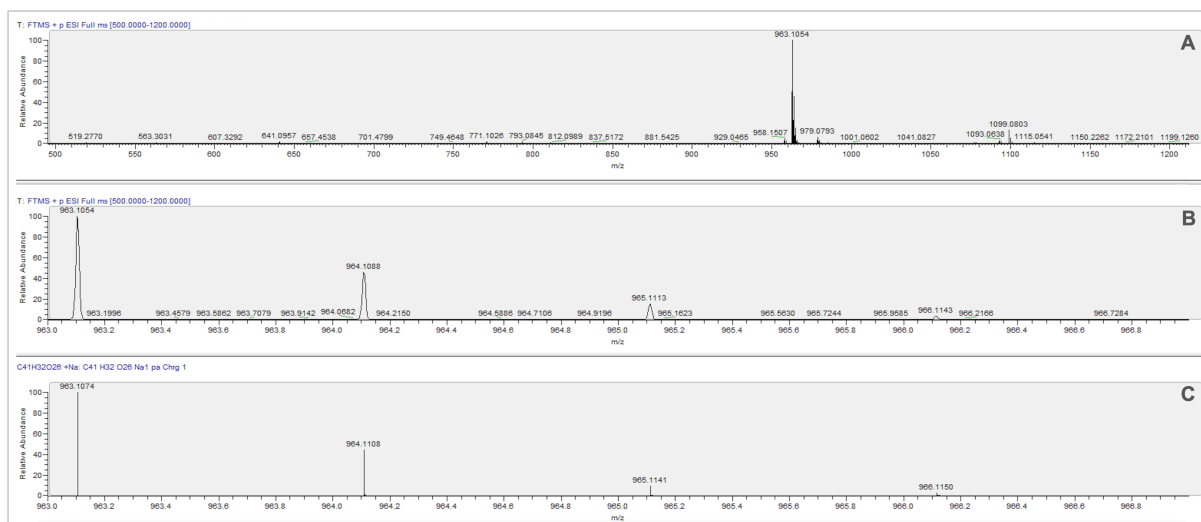

**Figure S7:** HR-ESI-MS spectra of 1,2,3,4,6-penta-O-galloyl-β-D-glucose (NMA2) showing the full mass spectrum (A), zoom in of the major peak region (B) and simulated spectrum for the shown molecular formula (C).

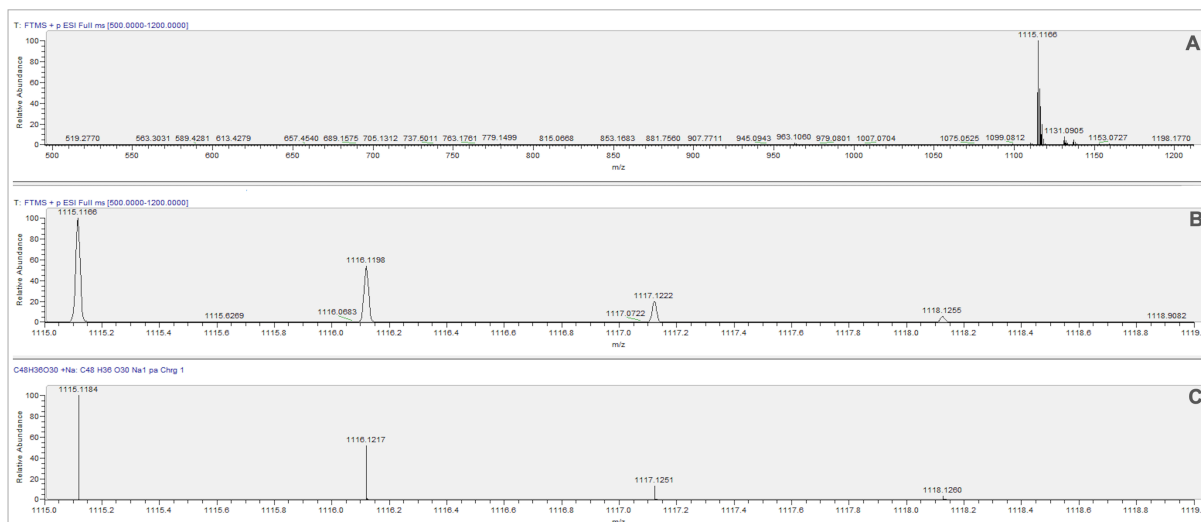

**Figure S8:** HR-ESI-MS spectra of 3-O-digalloyl-1,2,4,6-tetra-O-galloyl-β-D-glucose (NMB4) showing the full mass spectrum (A), zoom in of the major peak region (B) and simulated spectrum for the shown molecular formula (C).

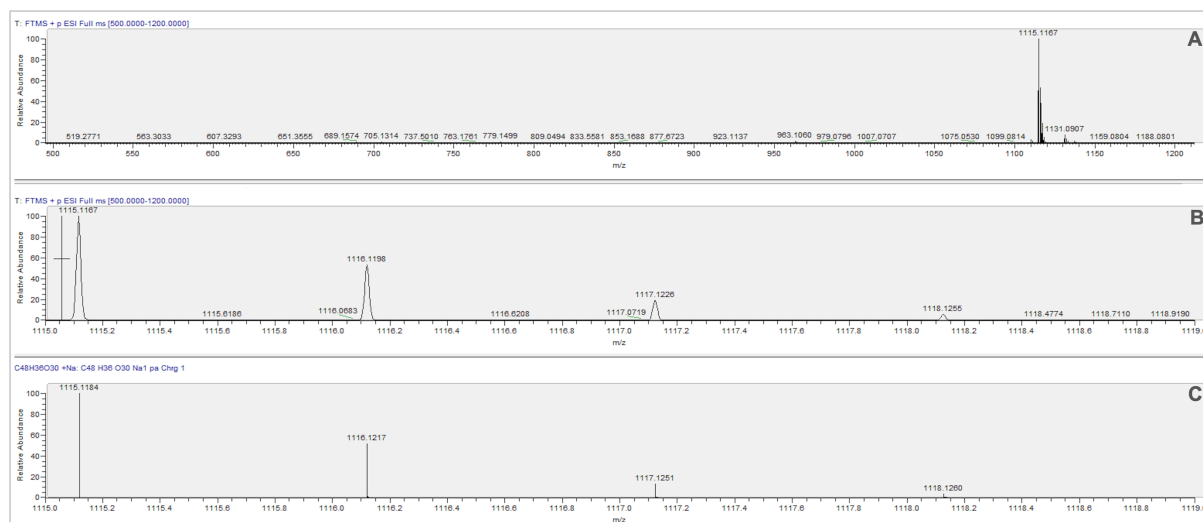

**Figure S9:** HR-ESI-MS spectra of 6-O-digalloyl-1,2,3,4-tetra-O-galloyl-β-D-glucose (NMB6) showing the full mass spectrum (A), zoom in of the major peak region (B) and simulated spectrum for the shown molecular formula (C).

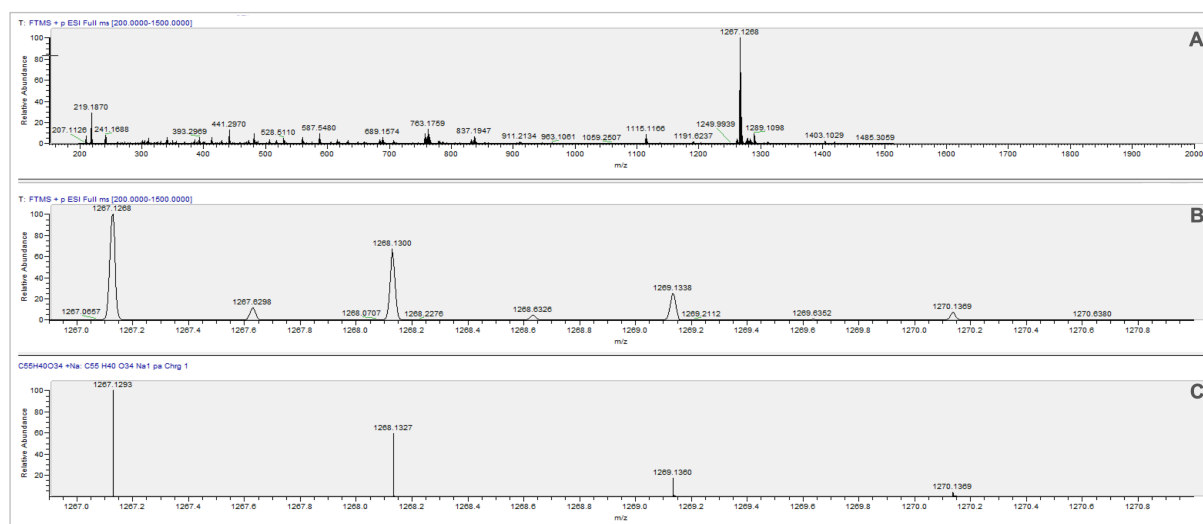

**Figure S10:** HR-ESI-MS spectra of 3,6-bis-O-digalloyl-1,2,4-tri-O-galloyl-β-D-glucose (NMC3) showing the full mass spectrum (A), zoom in of the major peak region (B) and simulated spectrum for the shown molecular formula (C).

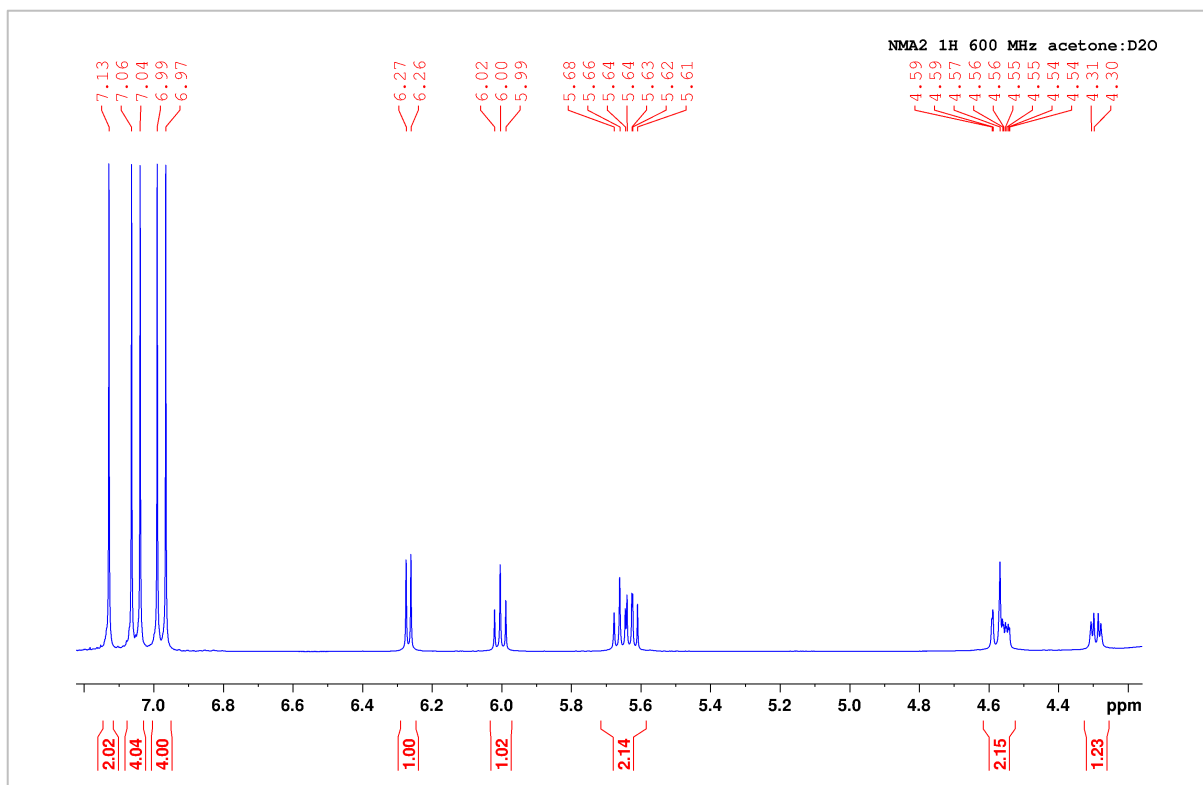

**Figure S11:**  $^1\text{H}$  spectrum of 1,2,3,4,6-penta-O-galloyl- $\beta$ -D-glucose (NMA2)

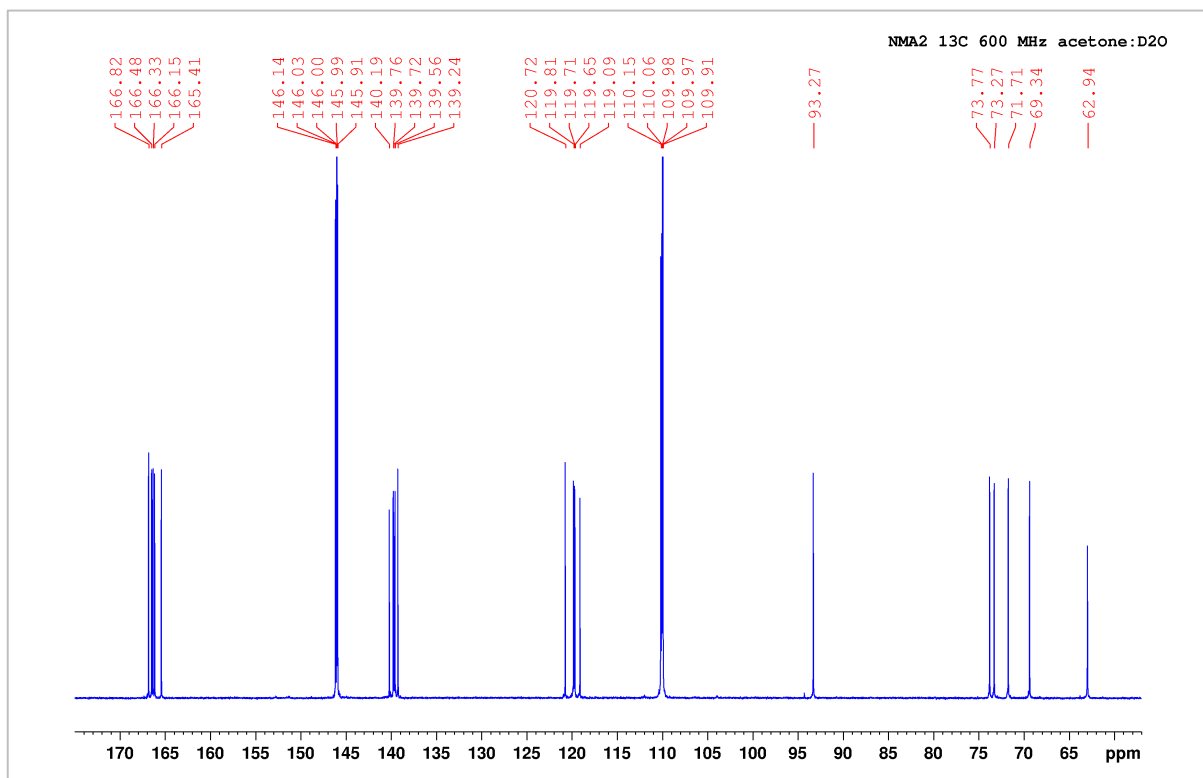

**Figure S12:**  $^{13}\text{C}$  spectrum of 1,2,3,4,6-penta-O-galloyl- $\beta$ -D-glucose (NMA2)

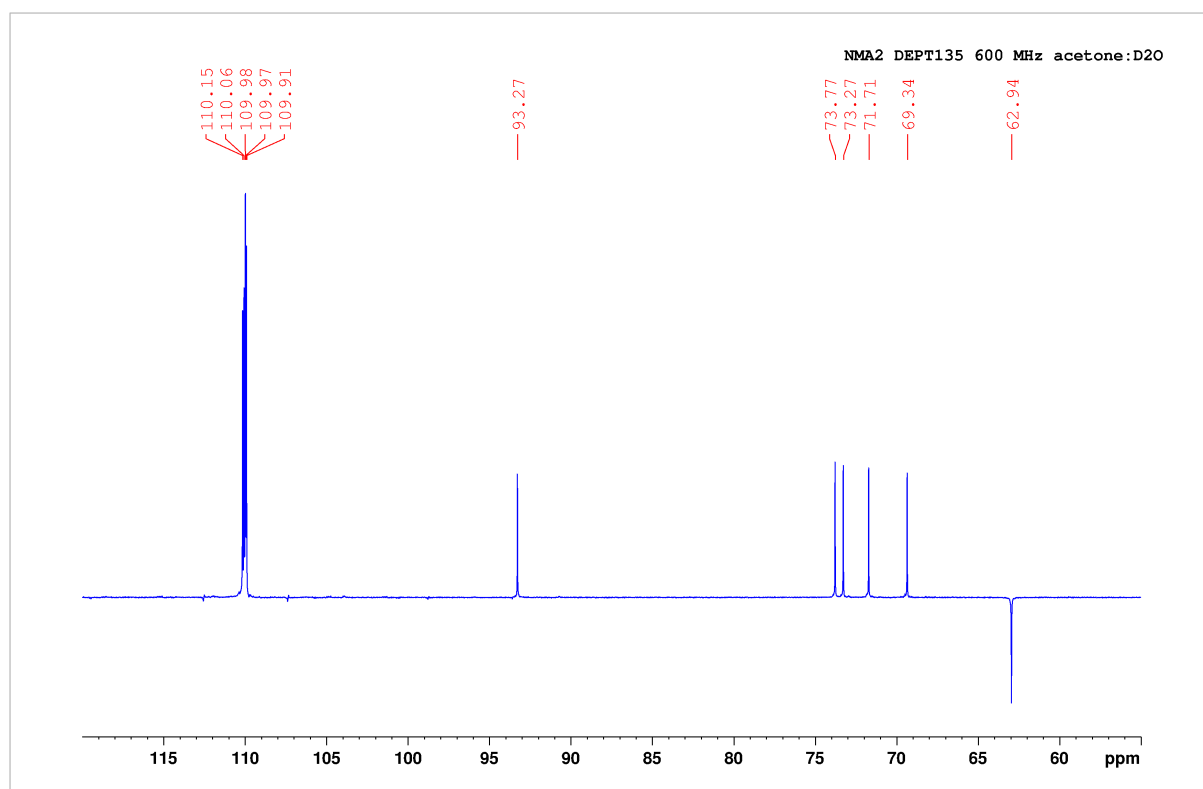

Figure S13: DEPT- 135 spectrum of 1,2,3,4,6-penta-O-galloyl- $\beta$ -D-glucose (NMA2)

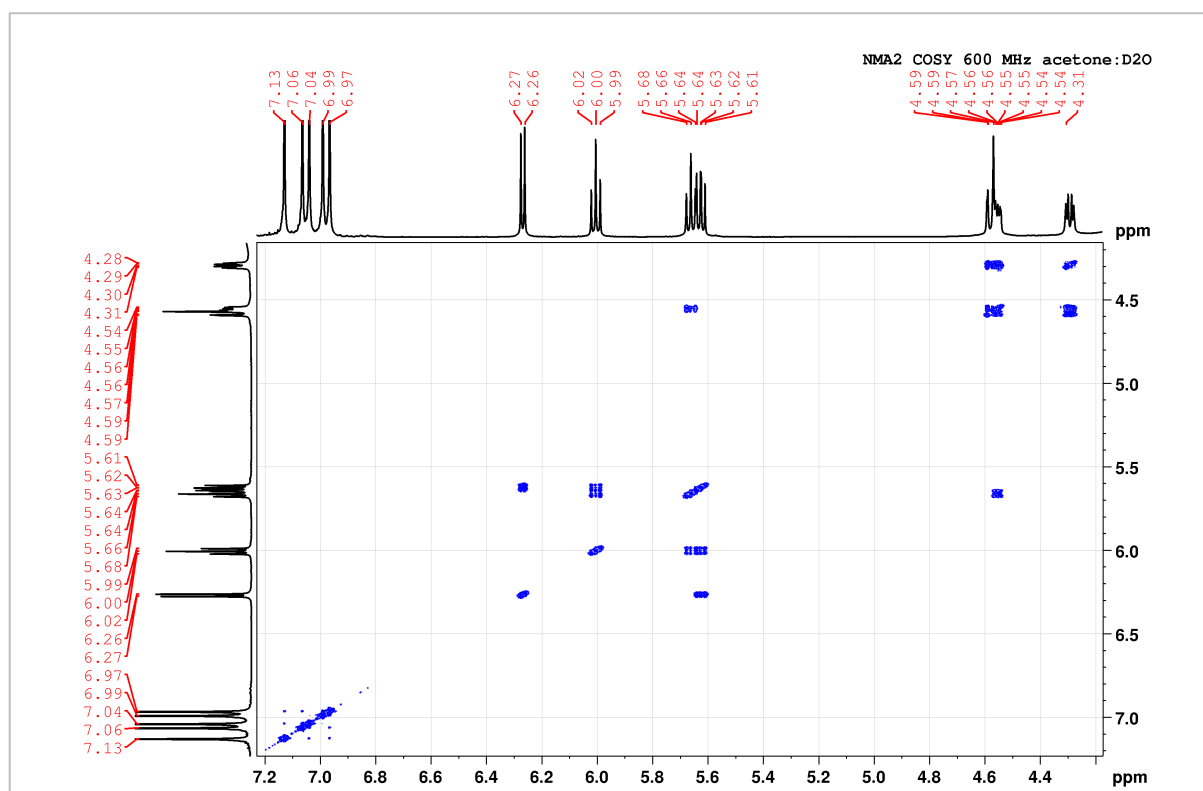

Figure S14: COSY spectrum of 1,2,3,4,6-penta-O-galloyl- $\beta$ -D-glucose (NMA2)

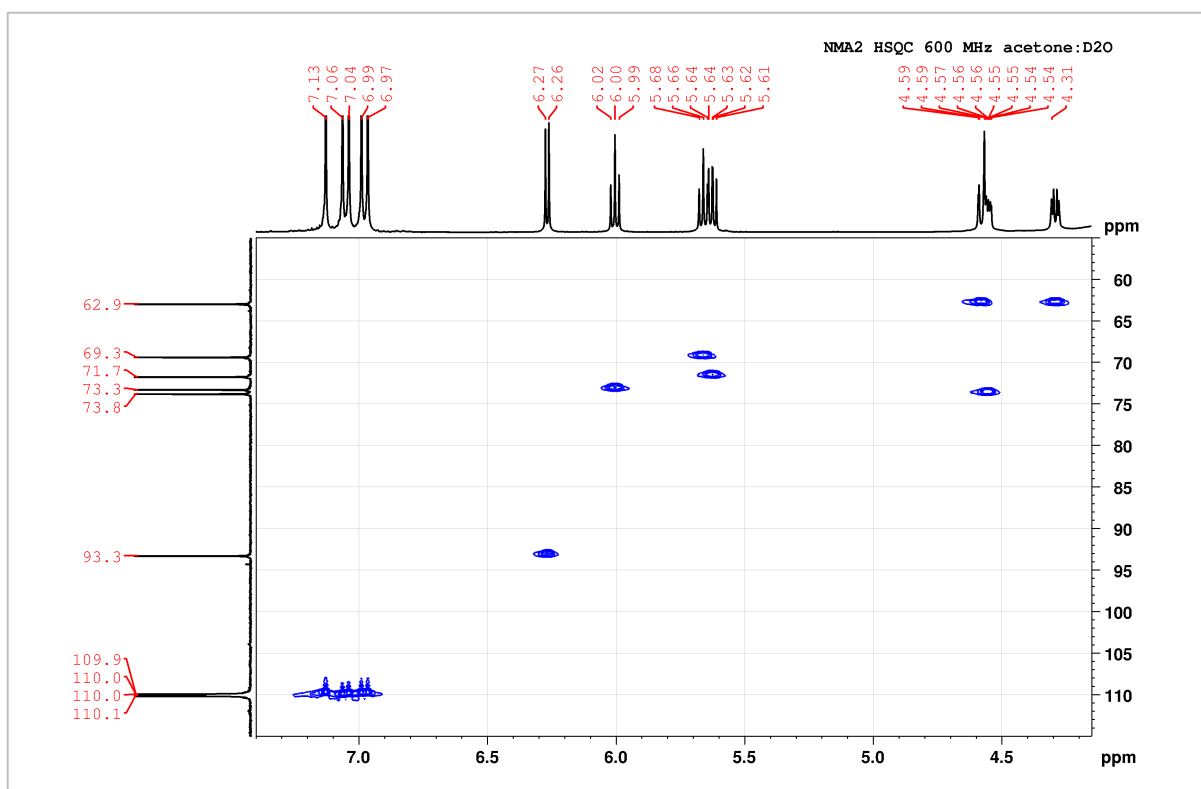

**Figure S15:** HSQC spectrum of 1,2,3,4,6-penta-O-galloyl- $\beta$ -D-glucose (NMA2)

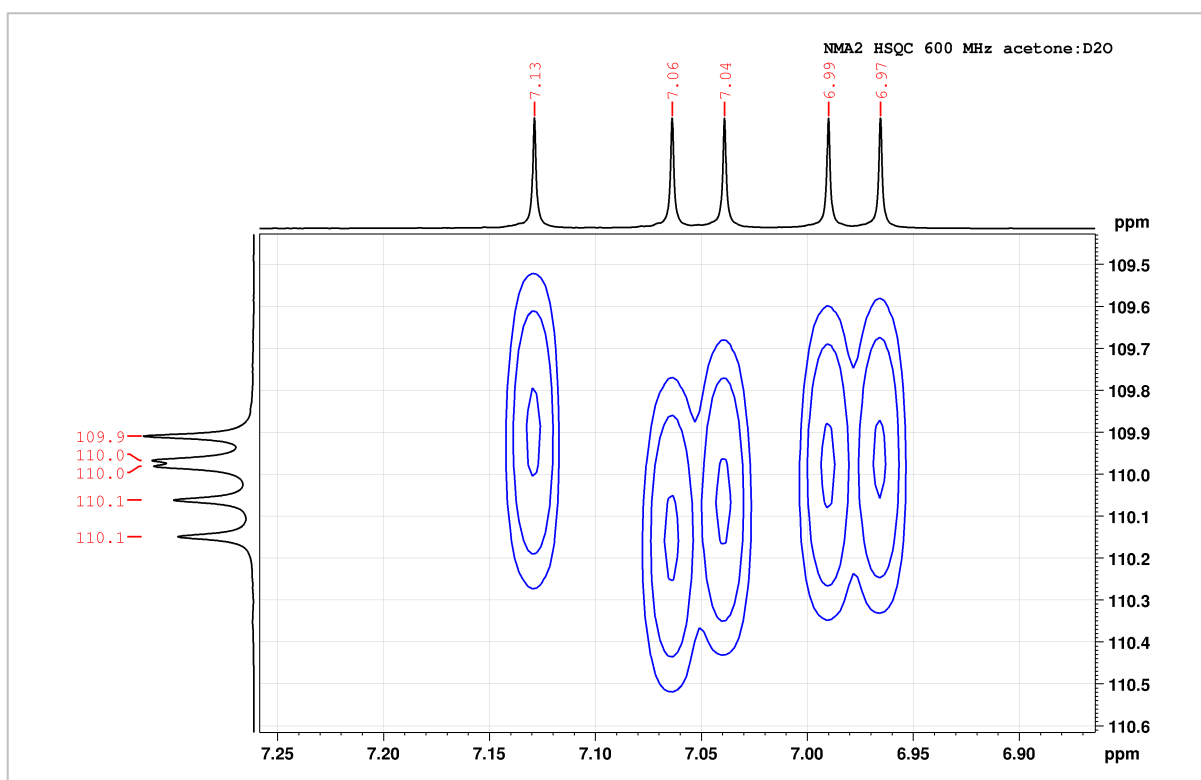

**Figure S16:** Zoom in of the aromatic aromatic region of HSQC spectrum of 1,2,3,4,6-penta-O-galloyl- $\beta$ -D-glucose (NMA2)

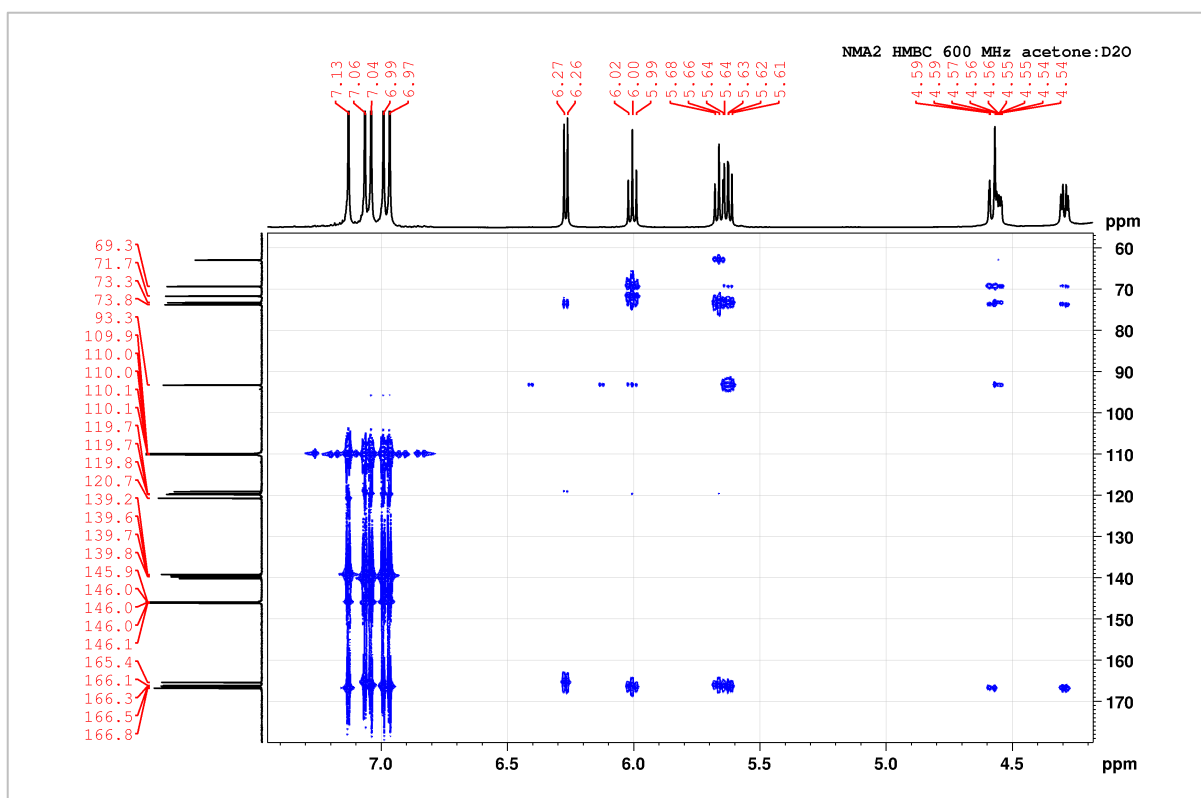

**Figure S17:** HMBC spectrum of 1,2,3,4,6-penta-O-galloyl- $\beta$ -D-glucose (NMA2)

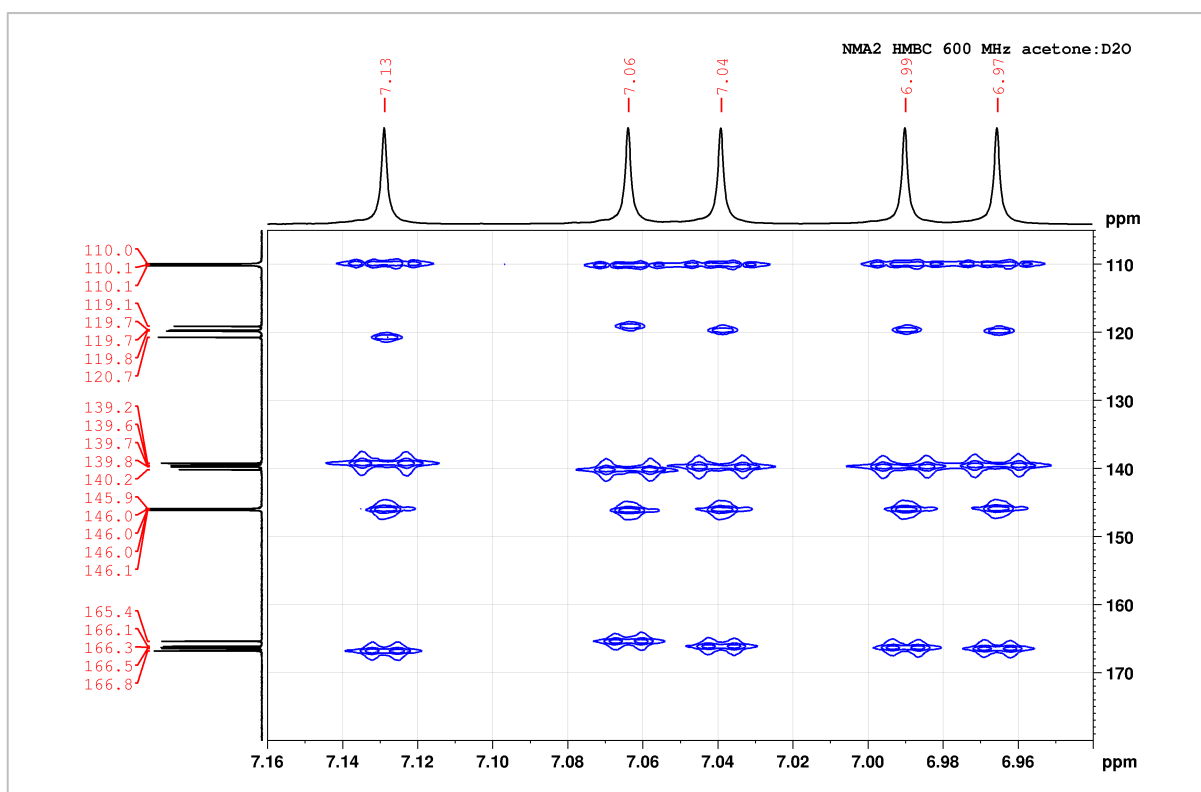

**Figure S18:** Zoom in of the aromatic region of HMBC spectrum of 1,2,3,4,6-penta-O-galloyl- $\beta$ -D-glucose (NMA2)

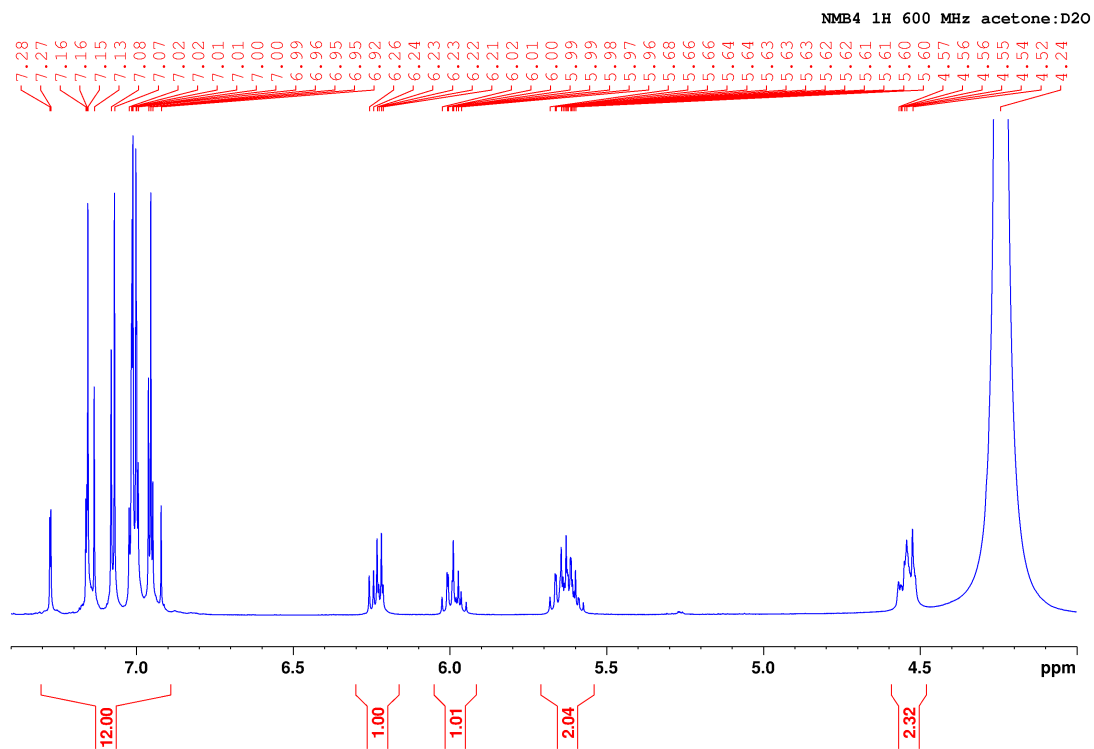

**Figure S19:**  $^1\text{H}$  spectrum of 3-O-digalloyl-1,2,4,6-tetra-O-galloyl- $\beta$ -D-glucose (NMB4)

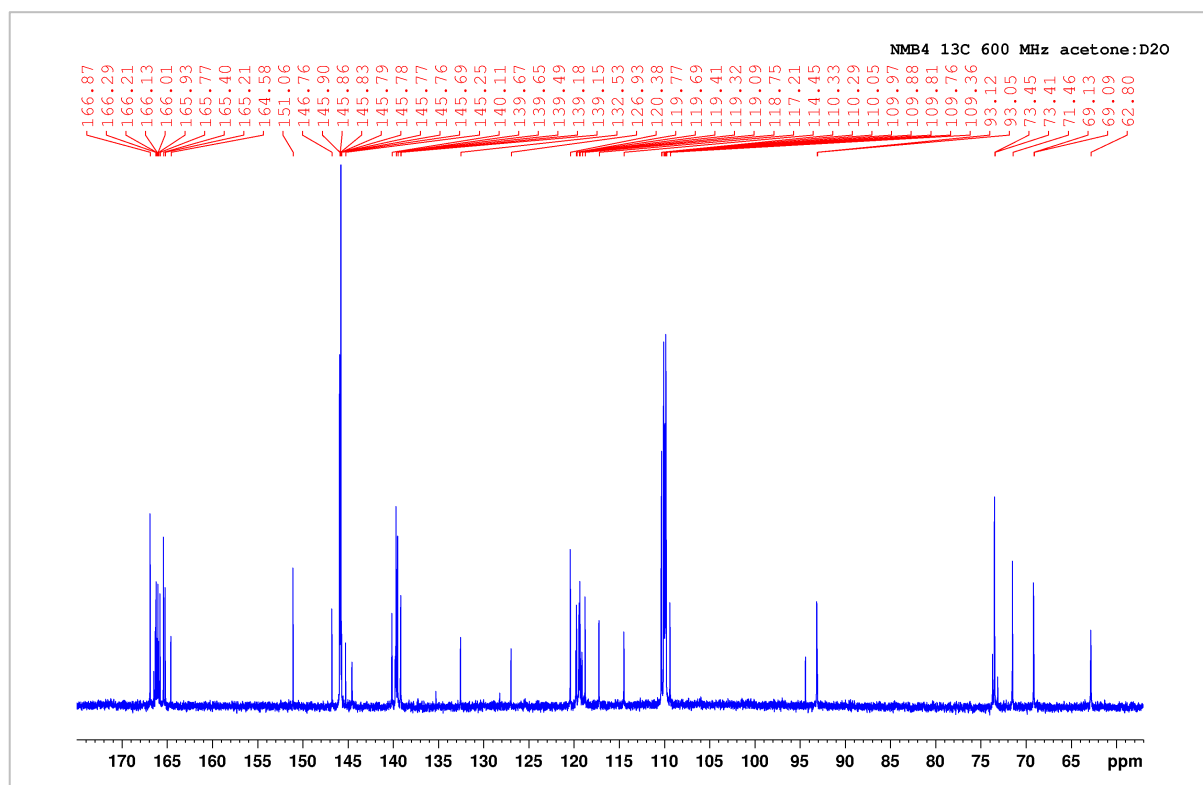

**Figure S20:**  $^{13}\text{C}$  spectrum of 3-O-digalloyl-1,2,4,6-tetra-O-galloyl- $\beta$ -D-glucose (NMB4)

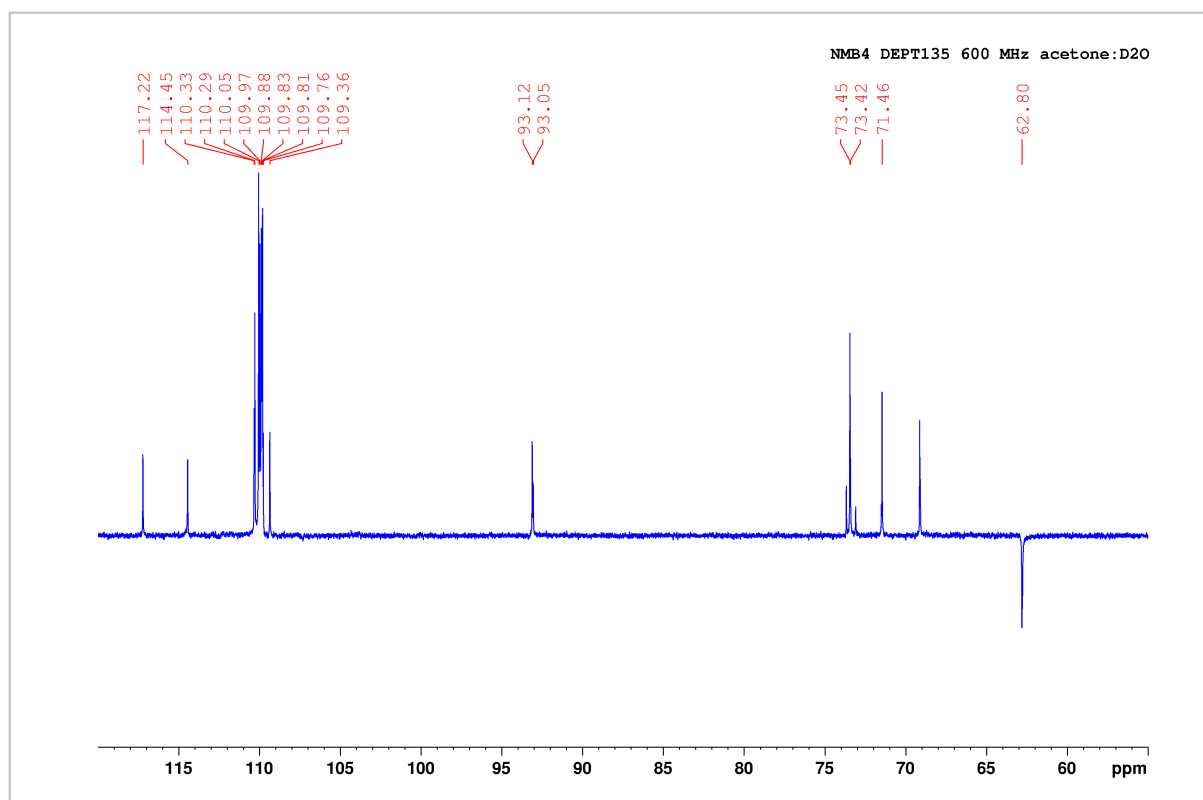

**Figure S21:** DEPT-135 of 3-O-digalloyl-1,2,4,6-tetra-O-galloyl- $\beta$ -D-glucose (NMB4)

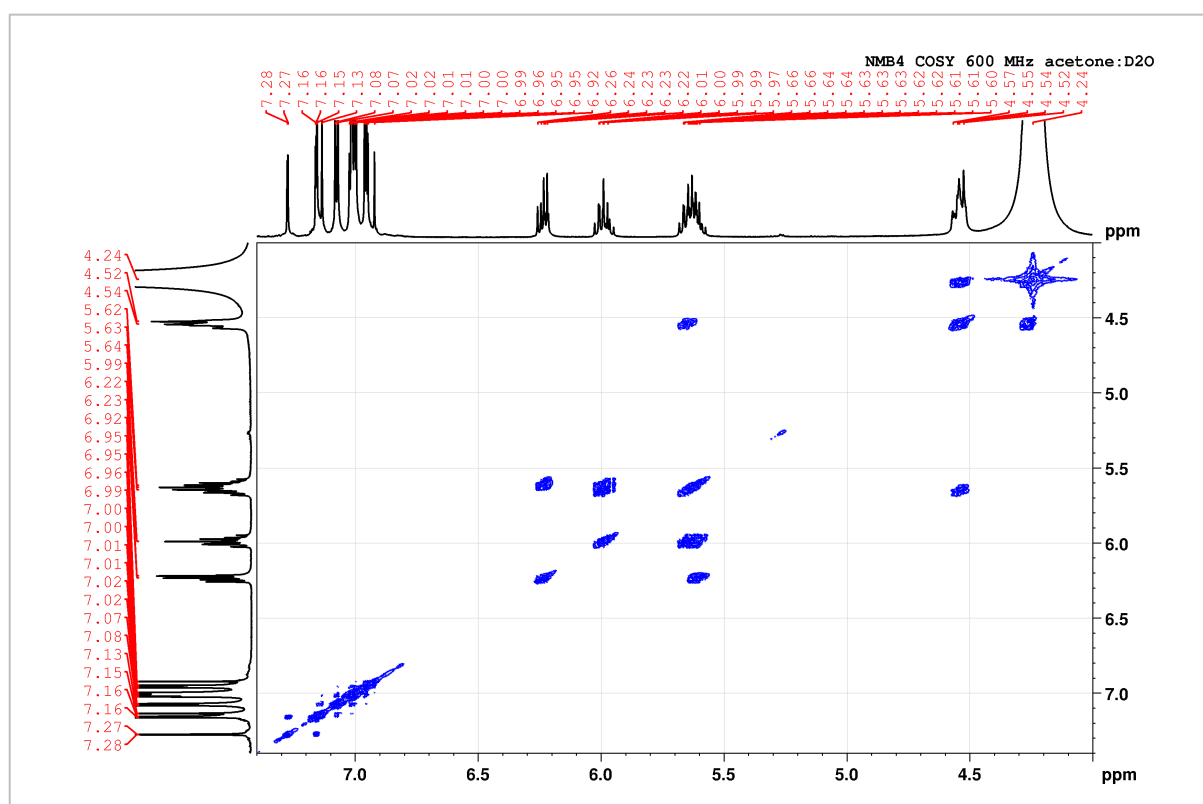

**Figure S22:** COSY Spectrum of 3-O-digalloyl-1,2,4,6-tetra-O-galloyl- $\beta$ -D-glucose (NMB4)

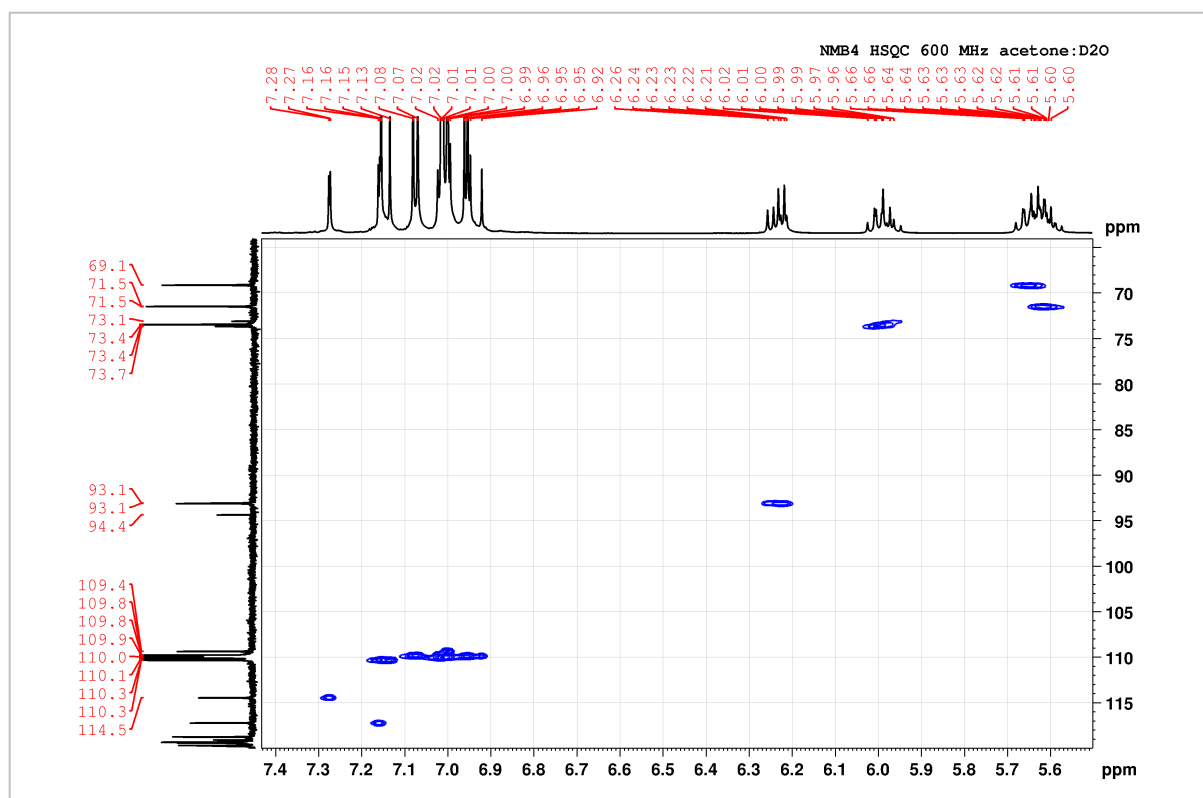

**Figure S23:** HSQC spectrum of 3-O-digalloyl-1,2,4,6-tetra-O-galloyl-β-D-glucose (NMB4)

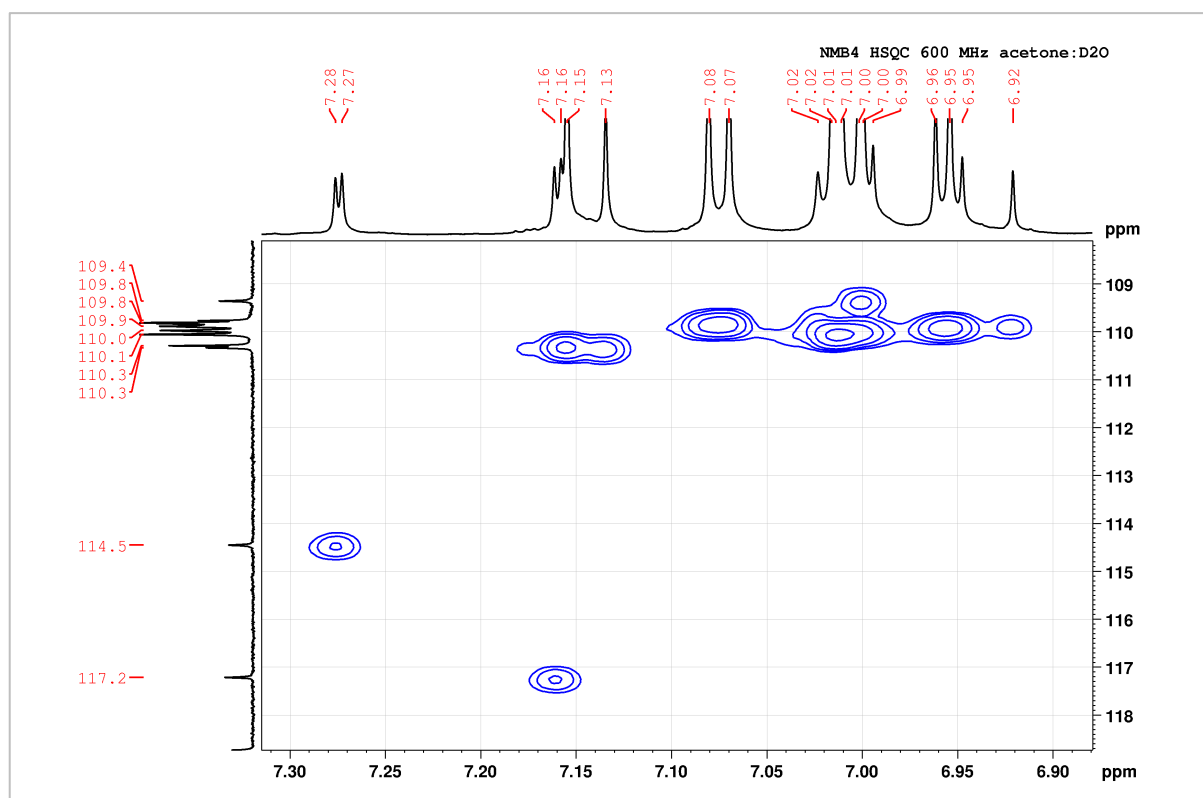

**Figure S24:** Zoom in of the aromatic region of HSQC spectrum of 3-O-digalloyl-1,2,4,6-tetra-O-galloyl-β-D-glucose (NMB4)

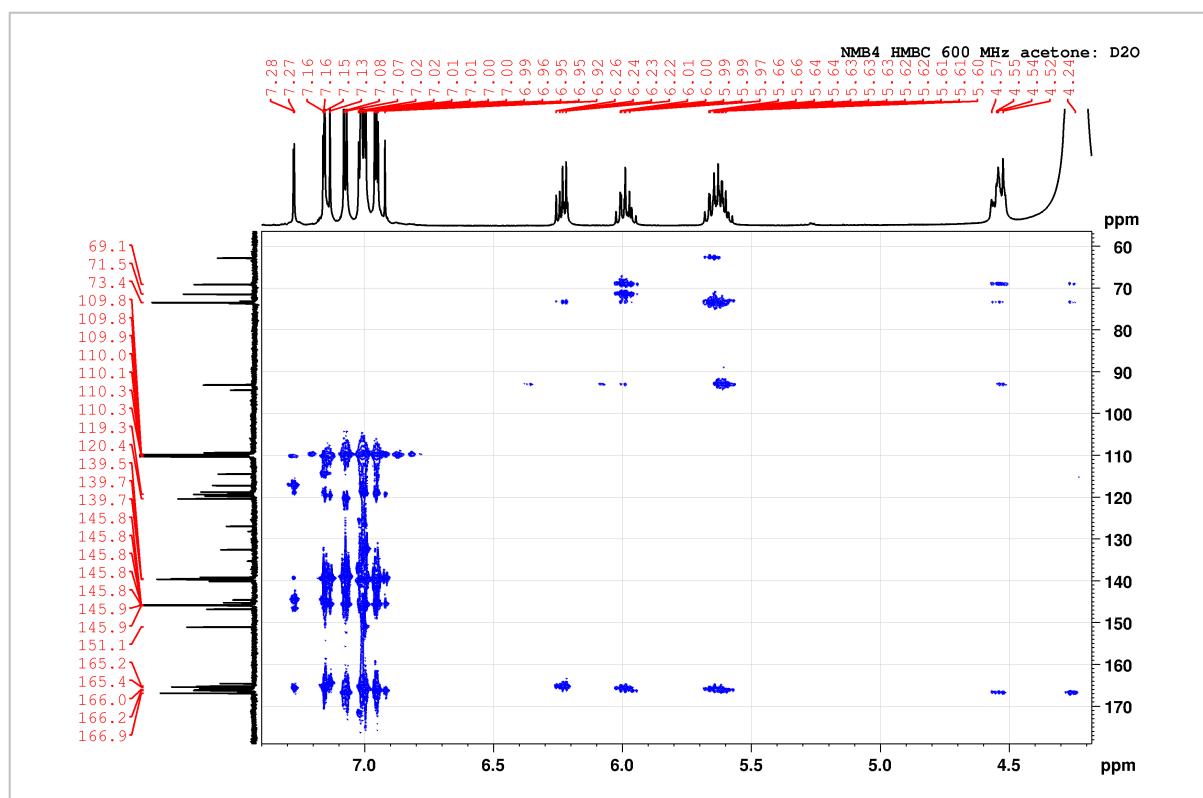

**Figure S25:** HMBC spectrum of 3-O-digalloyl-1,2,4,6-tetra-O-galloyl- $\beta$ -D-glucose (NMB4)

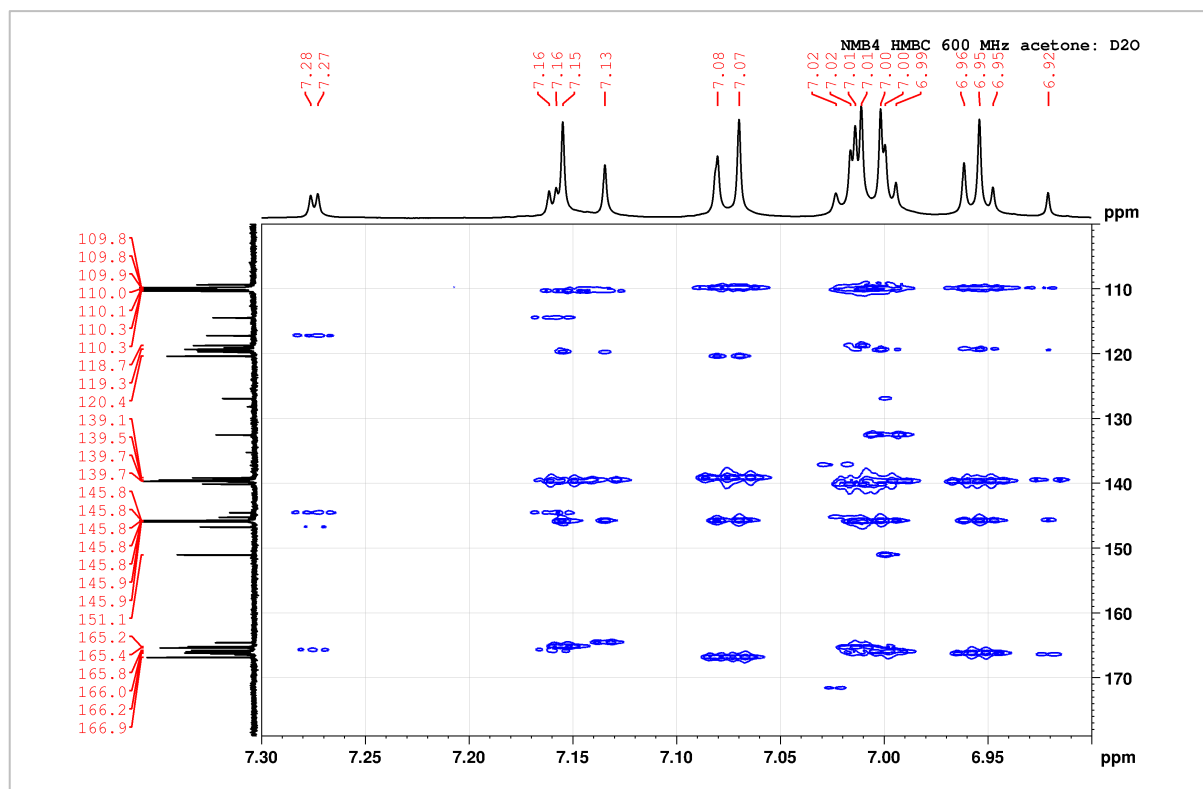

**Figure S26:** Zoom in of the aromatic region of HMBC spectrum of 3-O-digalloyl-1,2,4,6-tetra-O-galloyl- $\beta$ -D-glucose (NMB4)

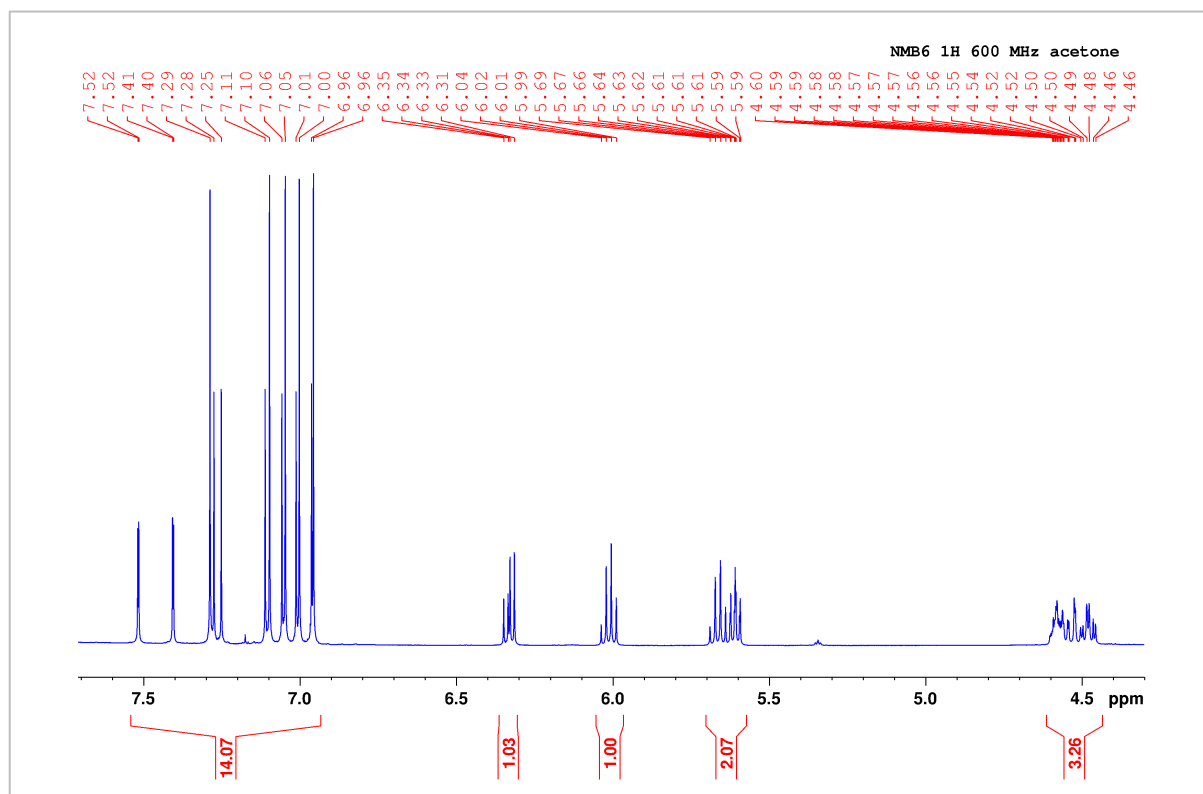

**Figure S27:**  $^1\text{H}$  spectrum of 6-O-digalloyl-1,2,3,4-tetra-O-galloyl- $\beta$ -D-glucose (NMB6)

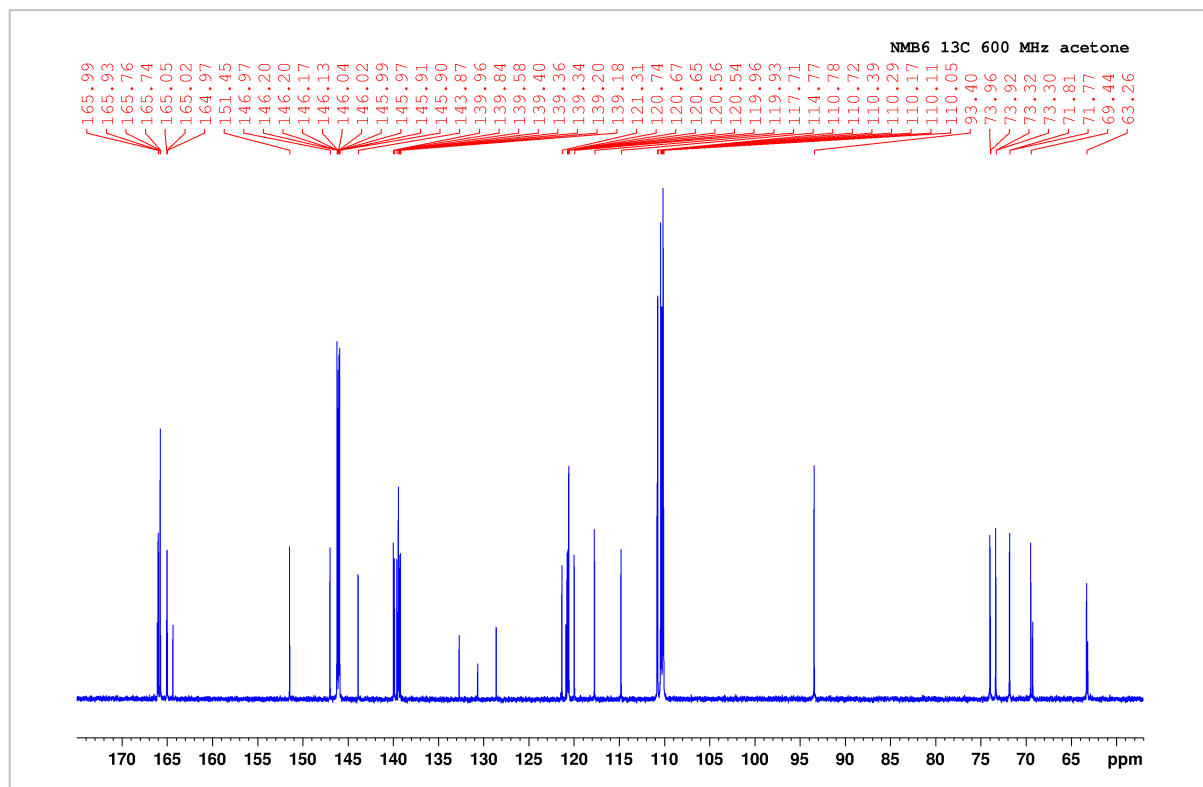

**Figure S28:**  $^{13}\text{C}$  spectrum of 6-O-digalloyl-1,2,3,4-tetra-O-galloyl- $\beta$ -D-glucose (NMB6)

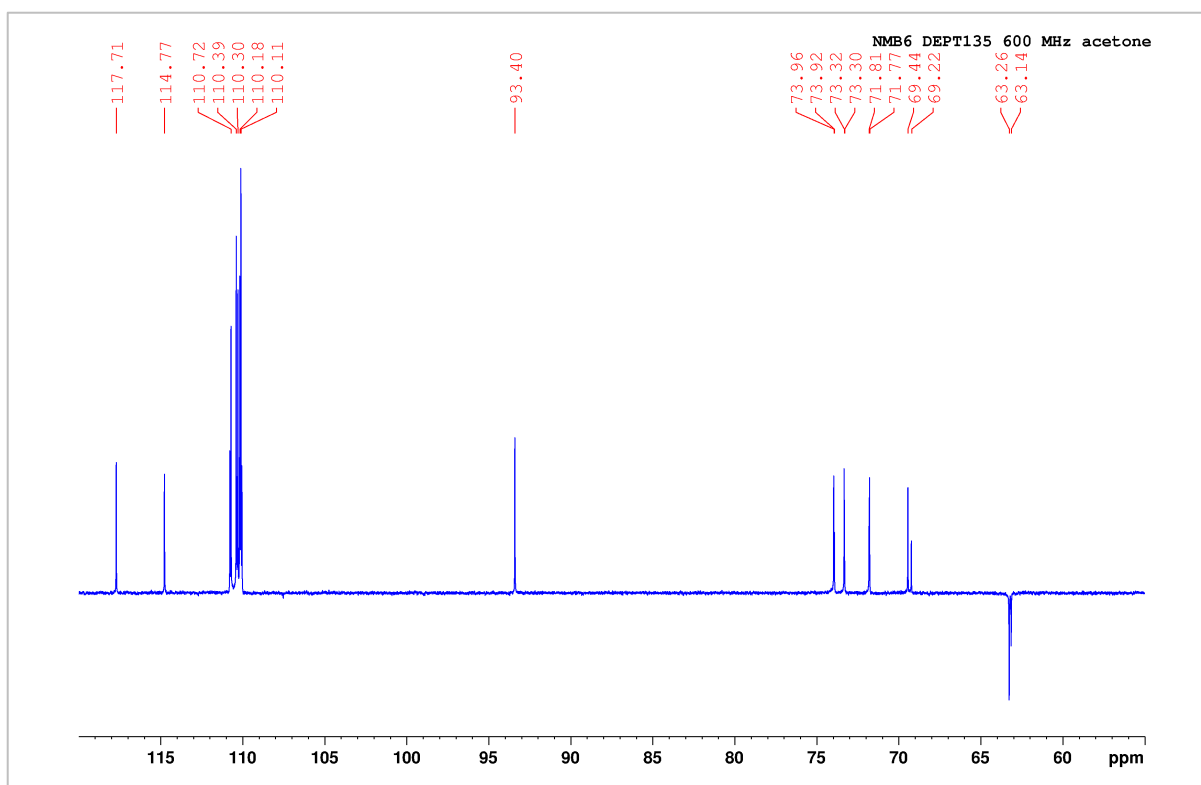

**Figure S29:** DEPT135 spectrum of 6-O-digalloyl-1,2,3,4-tetra-O-galloyl-β-D-glucose (NMB6)

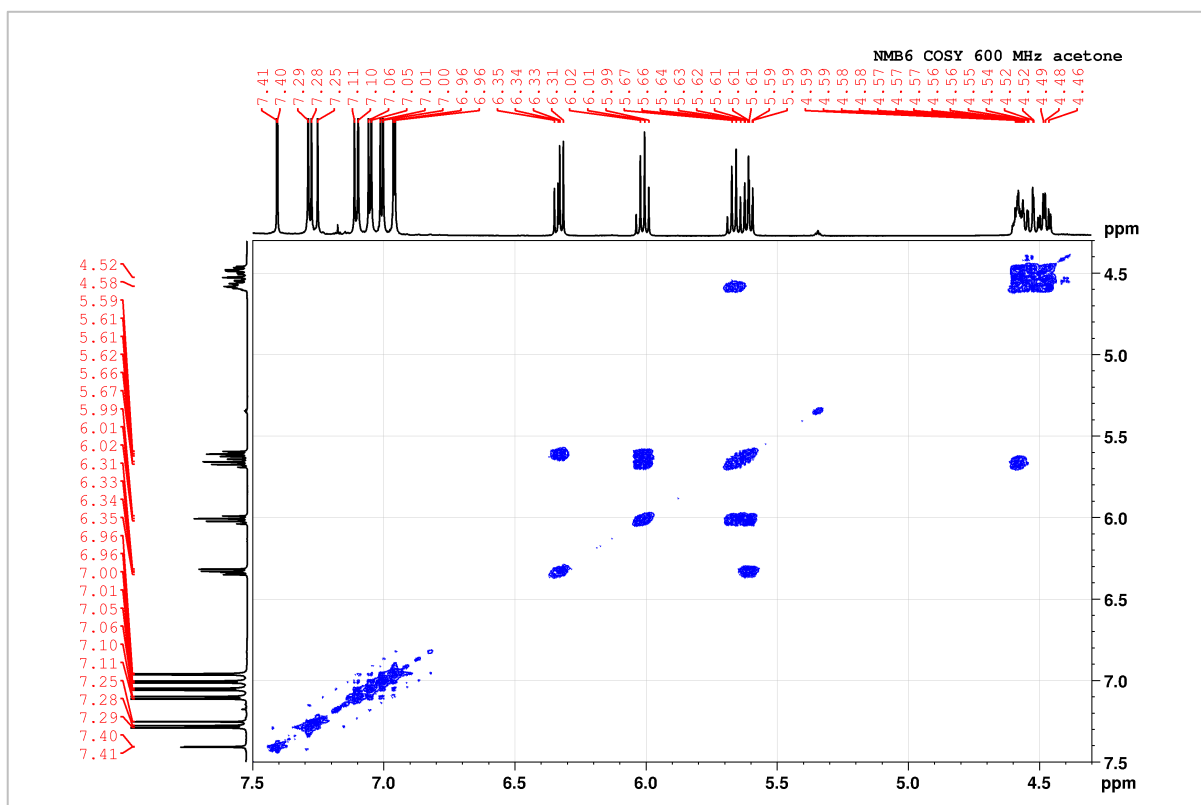

**Figure S30:** COSY spectrum of 6-O-digalloyl-1,2,3,4-tetra-O-galloyl-β-D-glucose (NMB6)

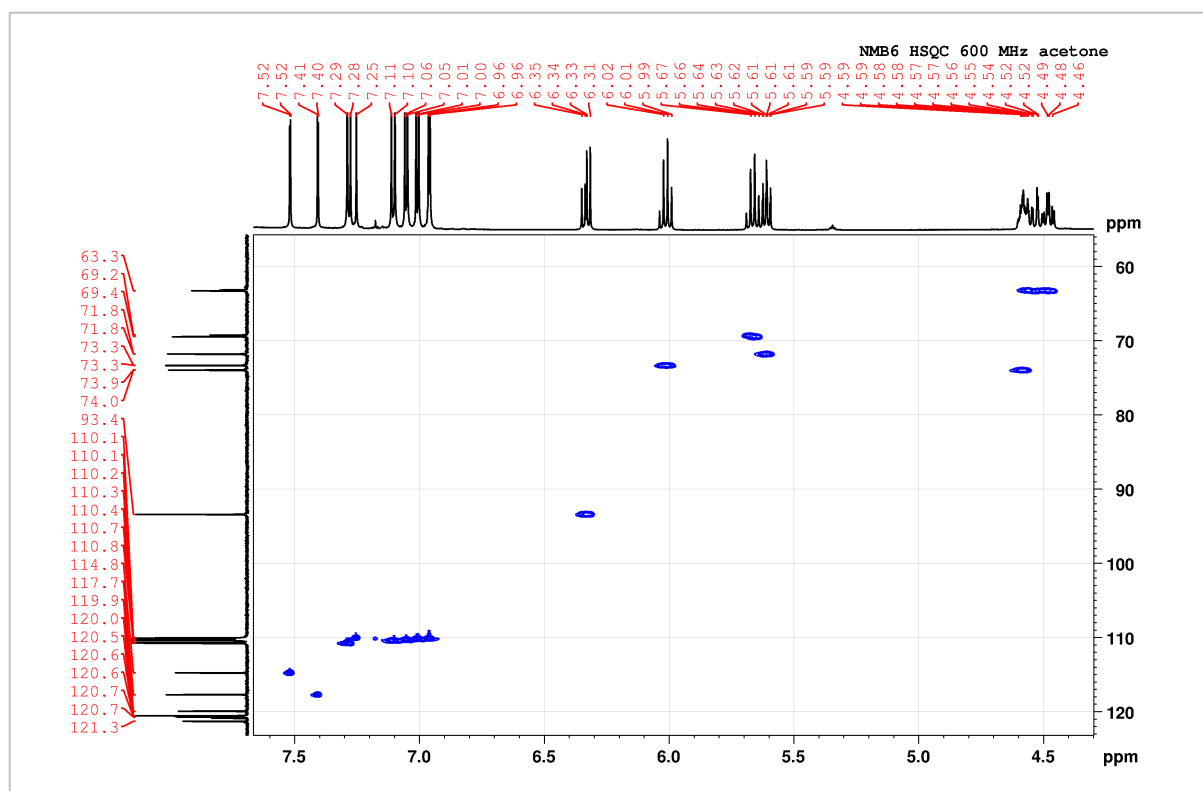

**Figure S31:** HSQC spectrum of 6-O-digalloyl-1,2,3,4-tetra-O-galloyl- $\beta$ -D-glucose (NMB6)

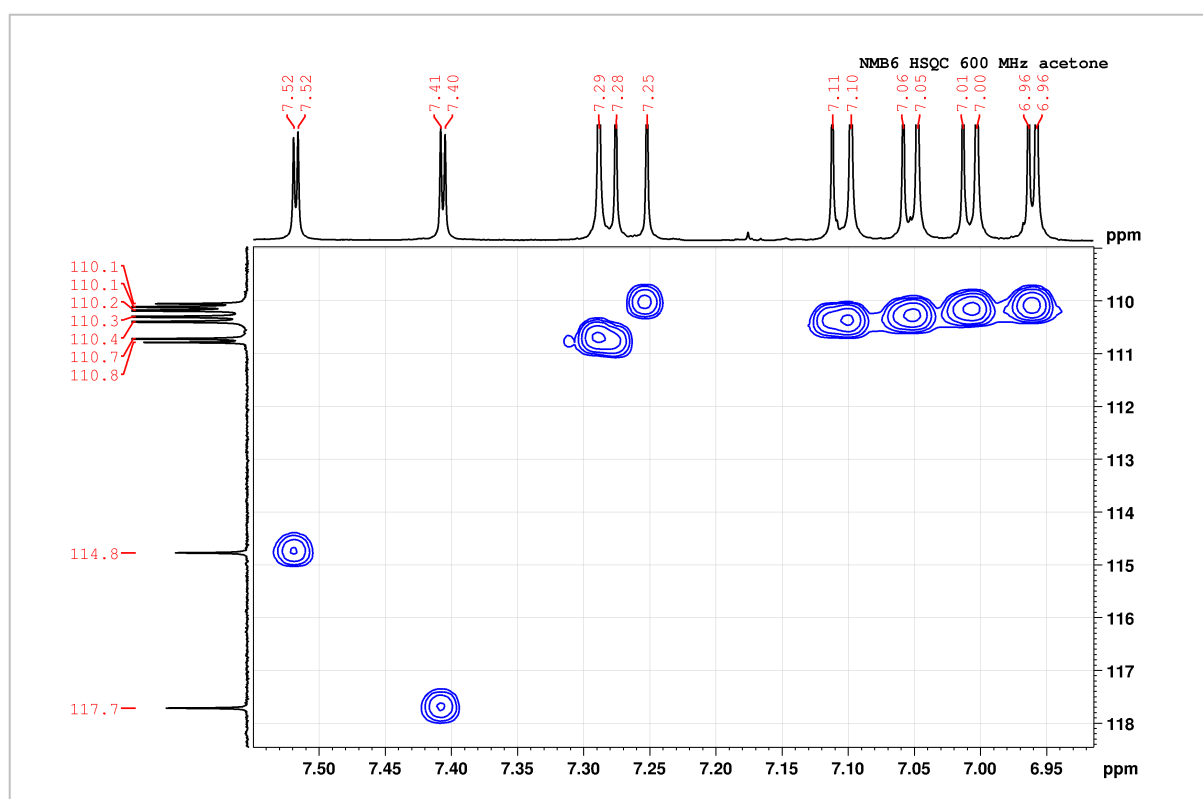

**Figure S32:** Zoom in of the aromatic region of HSQC spectrum of 6-O-digalloyl-1,2,3,4-tetra-O-galloyl- $\beta$ -D-glucose (NMB6)

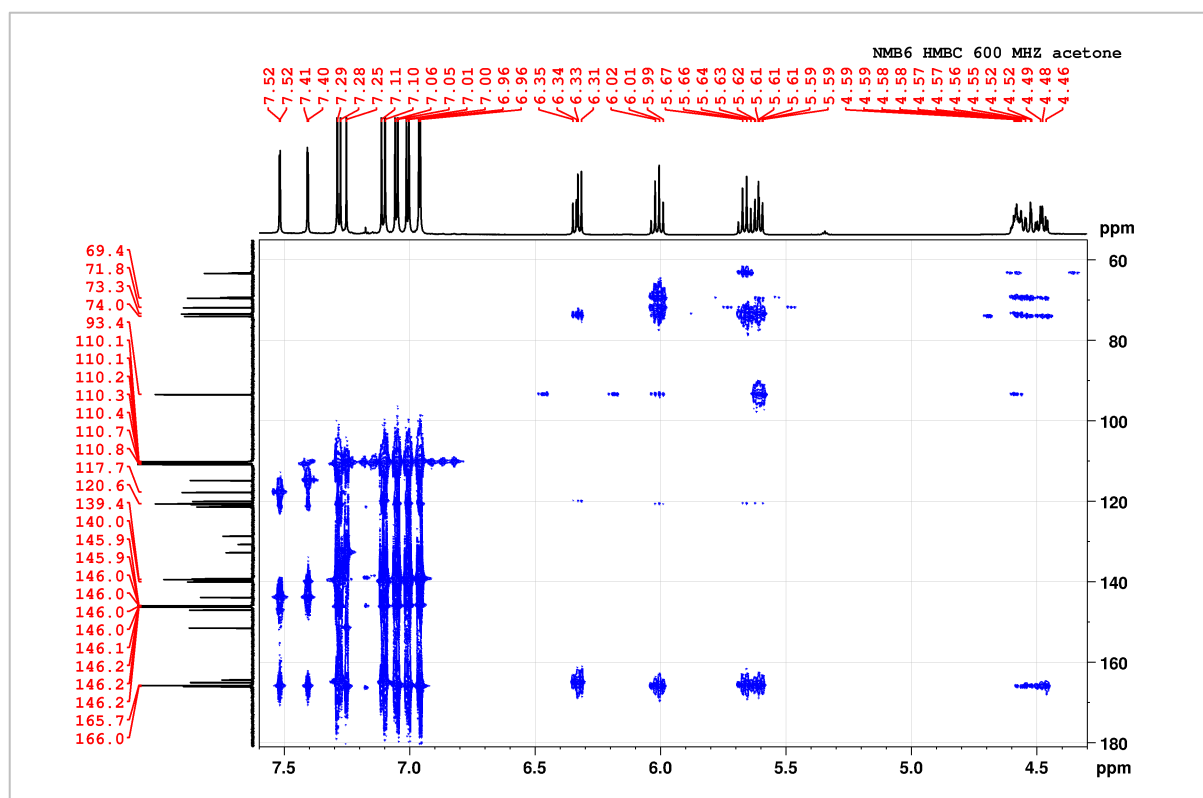

**Figure S33:** HMBC spectrum of 6-O-digalloyl-1,2,3,4-tetra-O-galloyl- $\beta$ -D-glucose (NMB6)

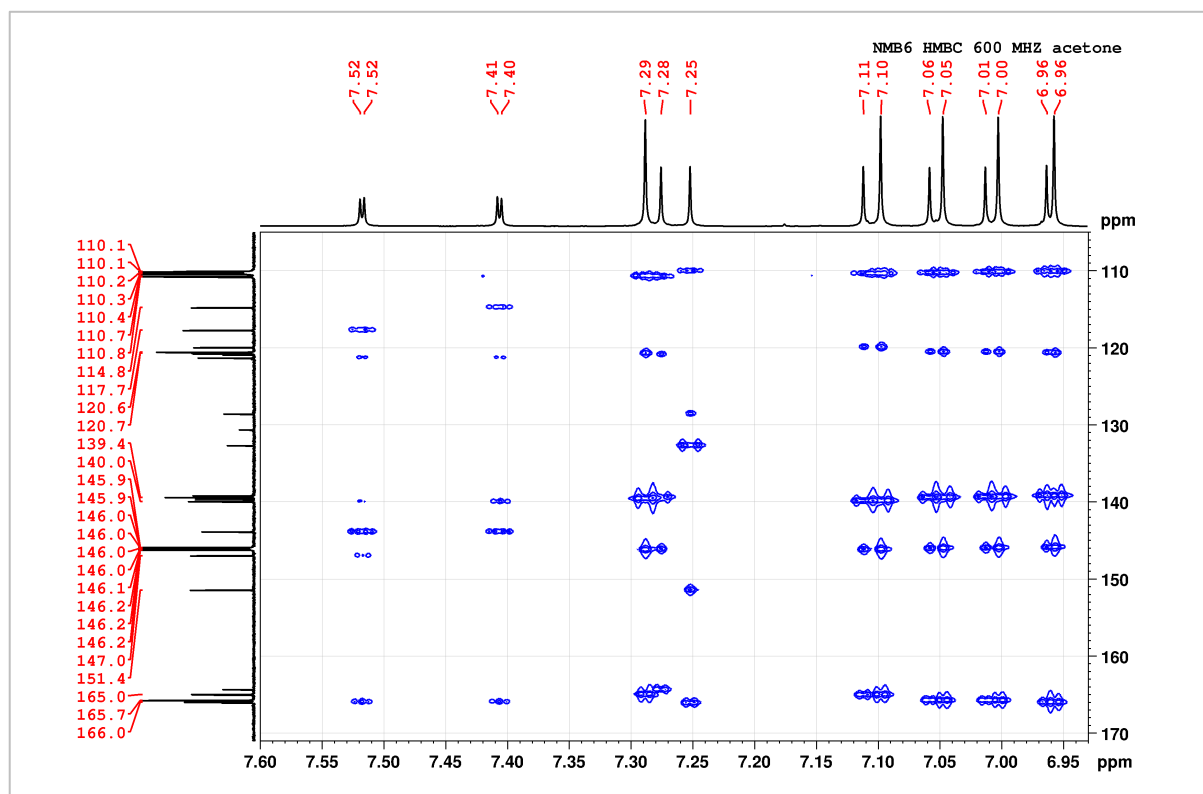

**Fig S34:** Zoom in of the aromatic region of HMBC spectrum of 6-O-digalloyl-1,2,3,4-tetra-O-galloyl- $\beta$ -D-glucose (NMB6)

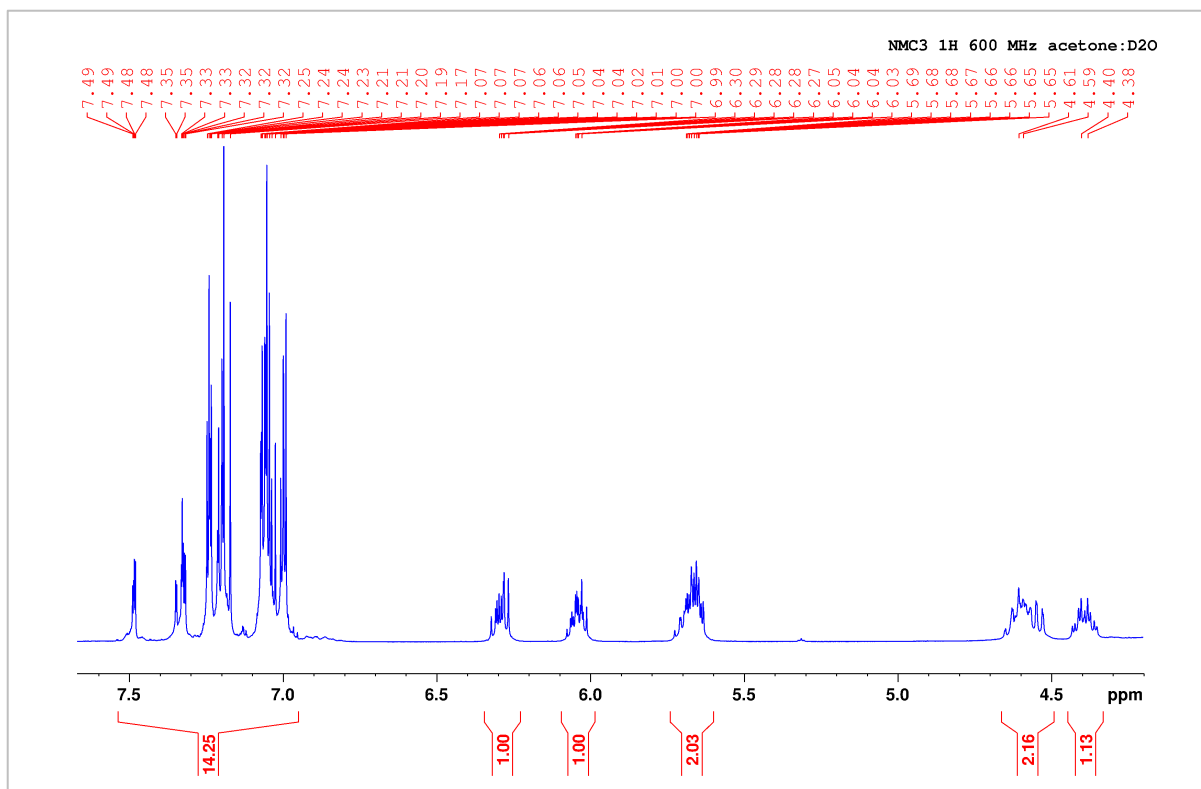

**Figure S35:**  $^1\text{H}$  spectrum of 3,6-bis-O-digalloyl-1,2,4-tri-O-galloyl- $\beta$ -D-glucose (NMC3)

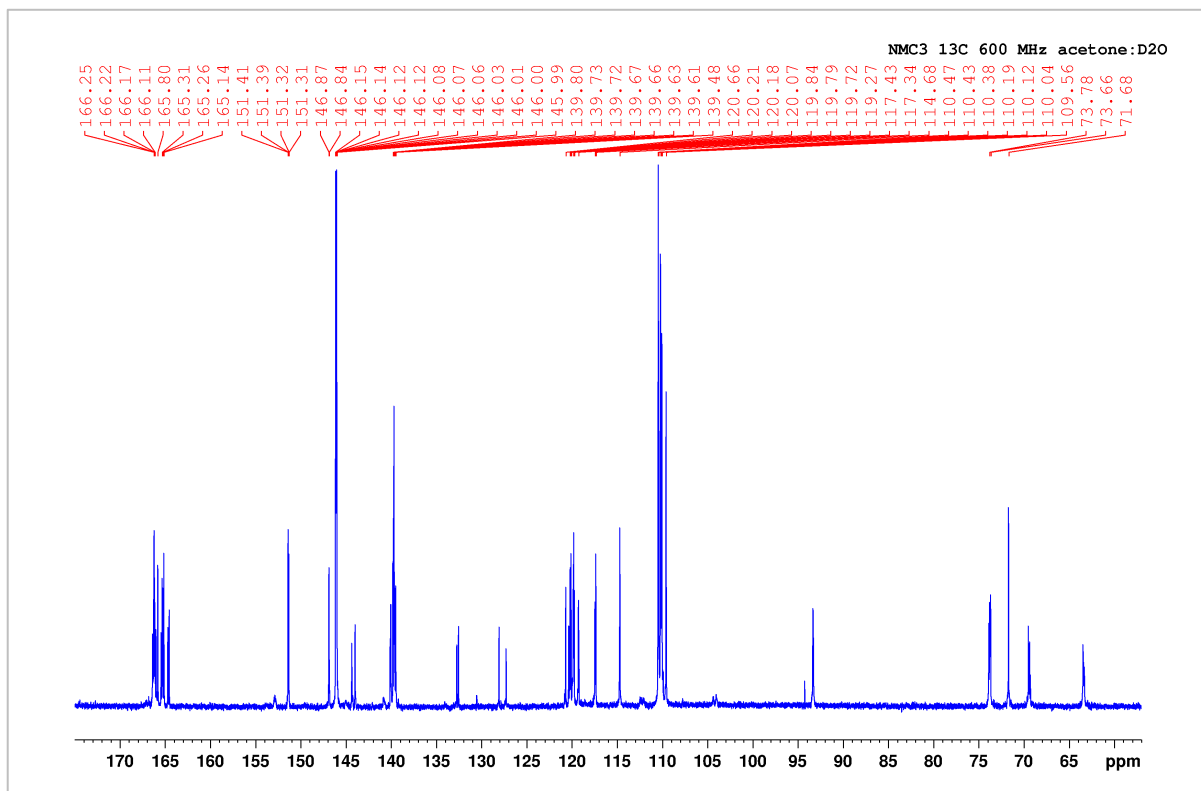

**Figure S36:**  $^{13}\text{C}$  spectrum of 3,6-bis-O-digalloyl-1,2,4-tri-O-galloyl- $\beta$ -D-glucose (NMC3)

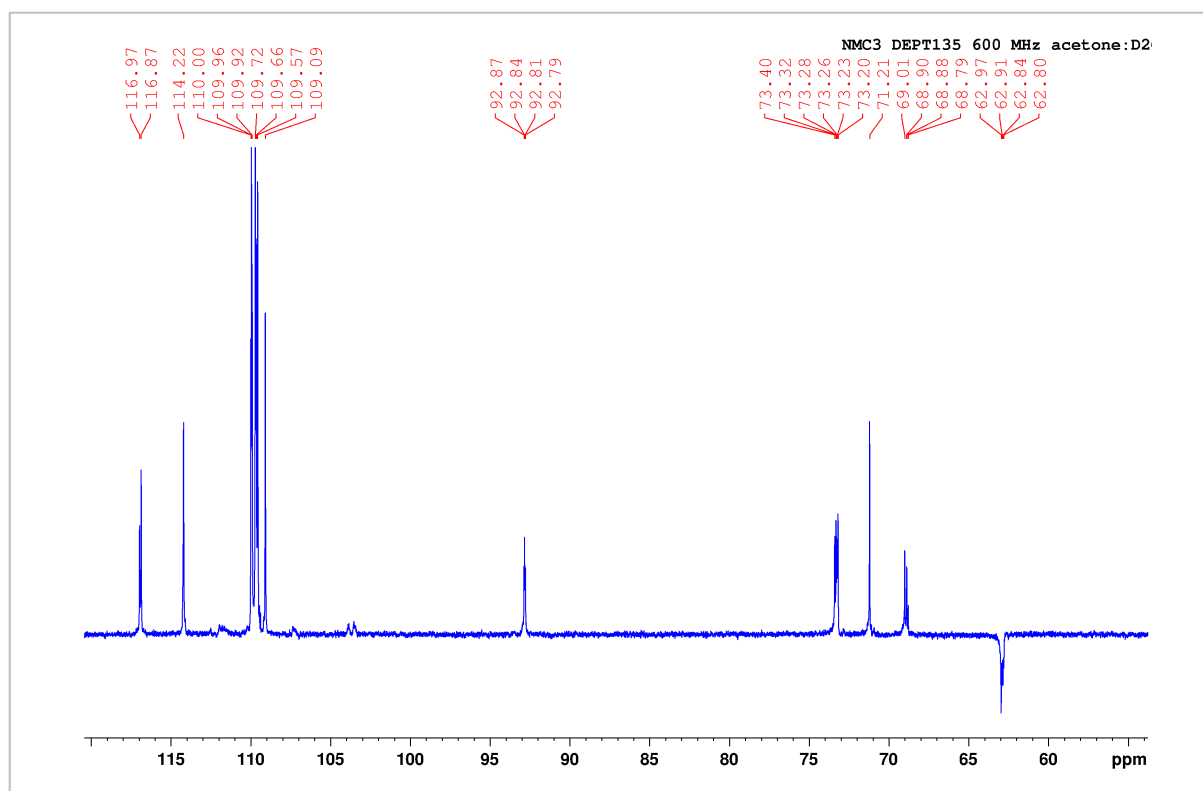

**Figure S37:** DEPT-135 spectrum of 3,6-bis-O-digalloyl-1,2,4-tri-O-galloyl-β-D-glucose (NMC3)

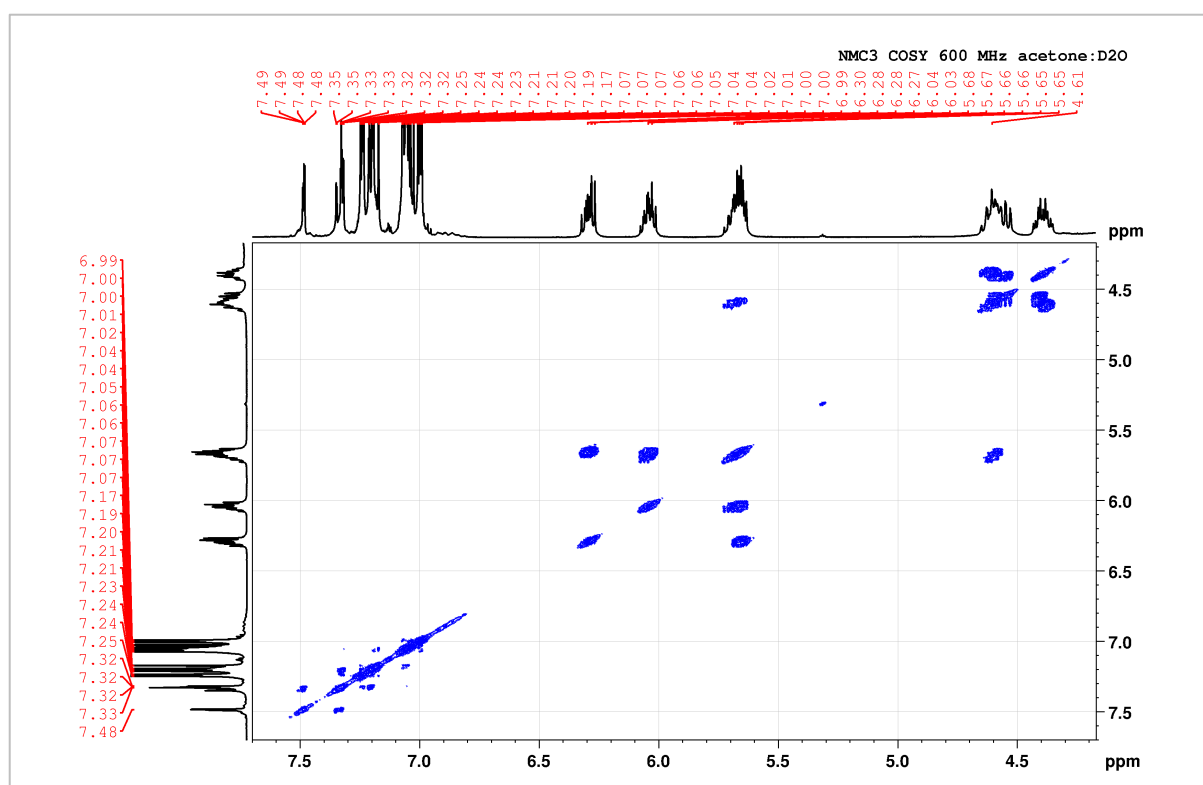

**Figure S38:** COSY spectrum of 3,6-bis-O-digalloyl-1,2,4-tri-O-galloyl-β-D-glucose (NMC3)

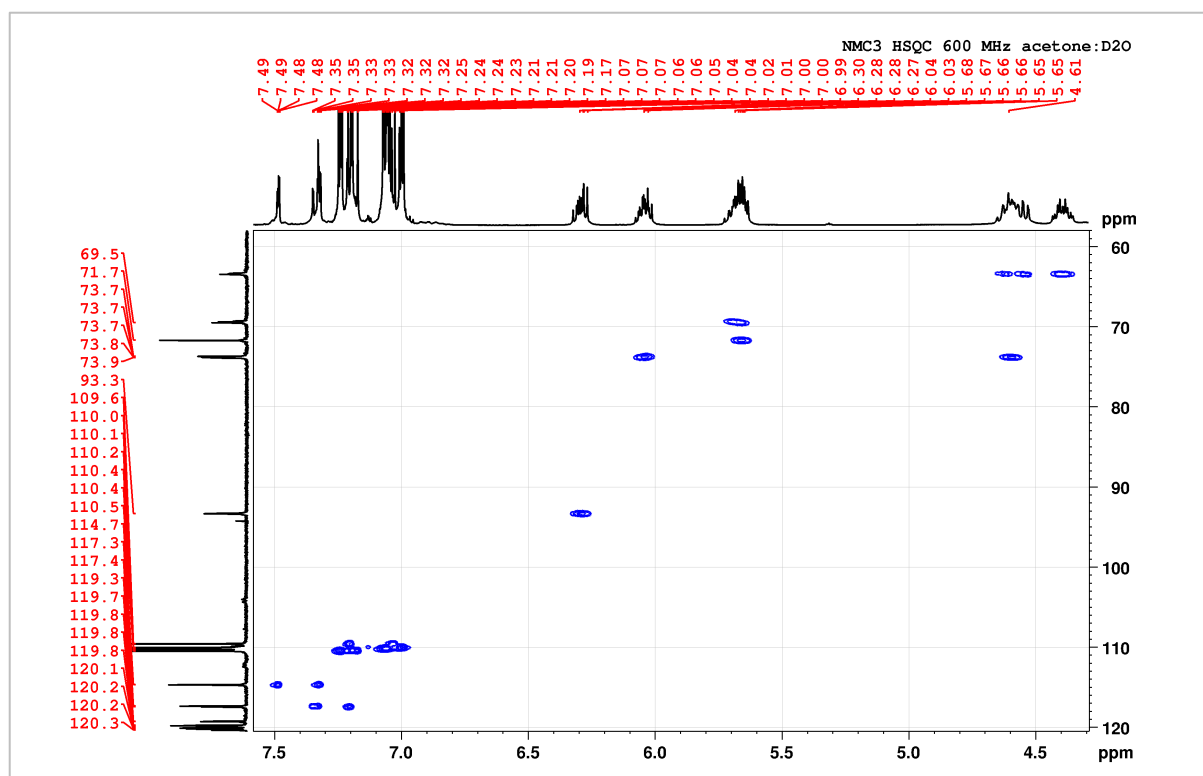

**Figure S39:** HSQC spectrum of 3,6-bis-O-digalloyl-1,2,4-tri-O-galloyl- $\beta$ -D-glucose (NMC3)

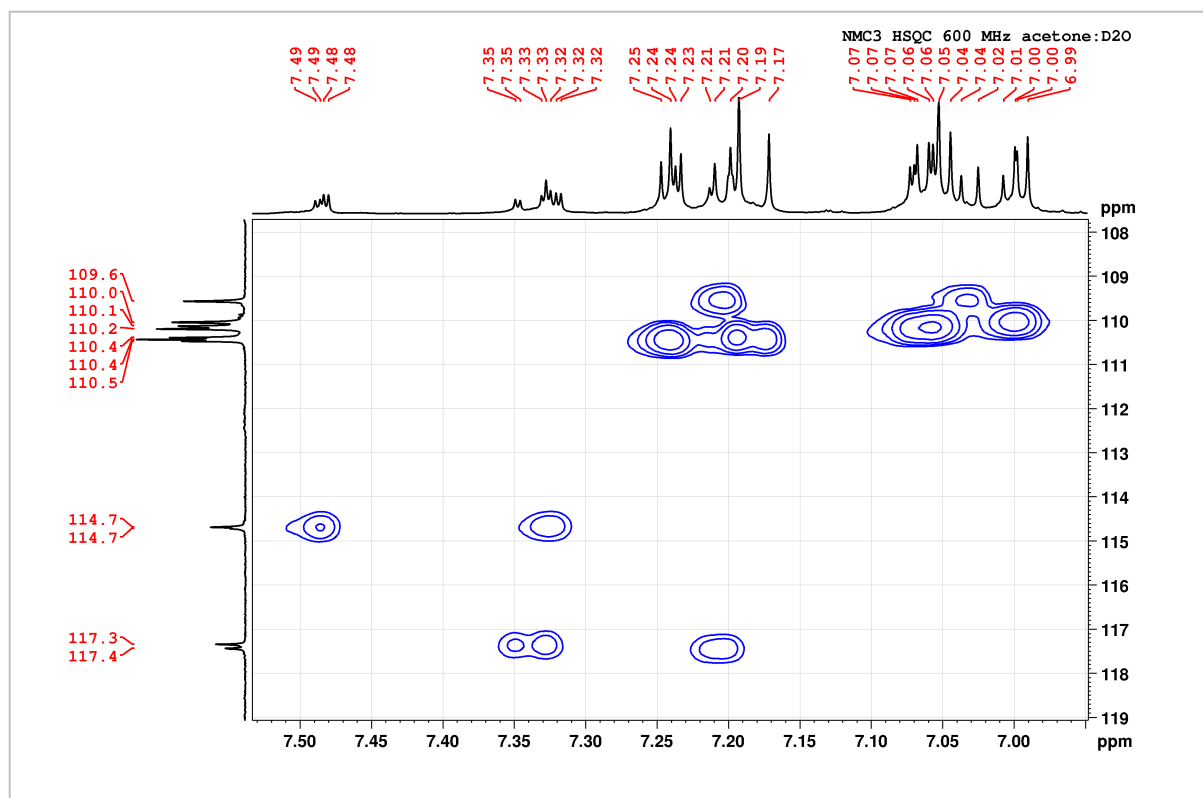

**Figure S40:** Zoom in of the aromatic region of the HSQC spectrum of 6-O-digalloyl-1,2,3,4-tetra-O-galloyl- $\beta$ -D-glucose (NMB6)

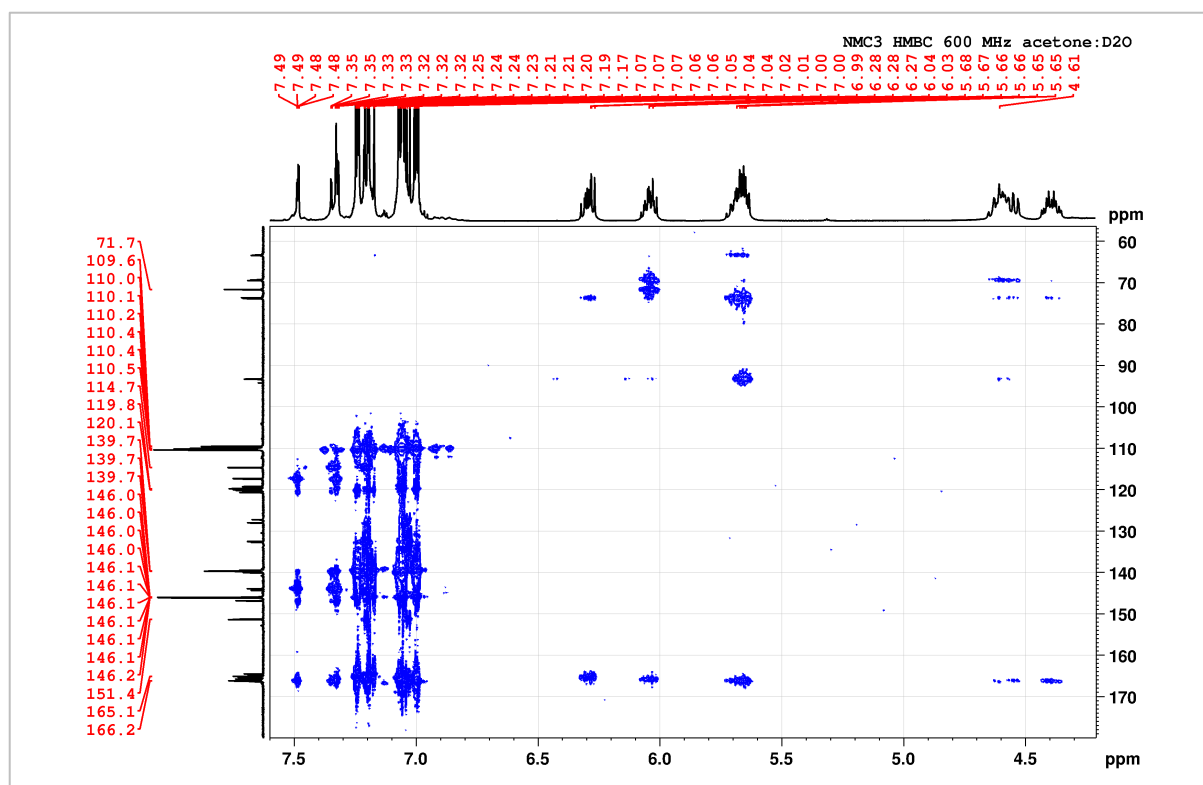

**Figure S41:** HMBC spectrum of 3,6-bis-O-digalloyl-1,2,4-tri-O-galloyl- $\beta$ -D-glucose (NMC3)

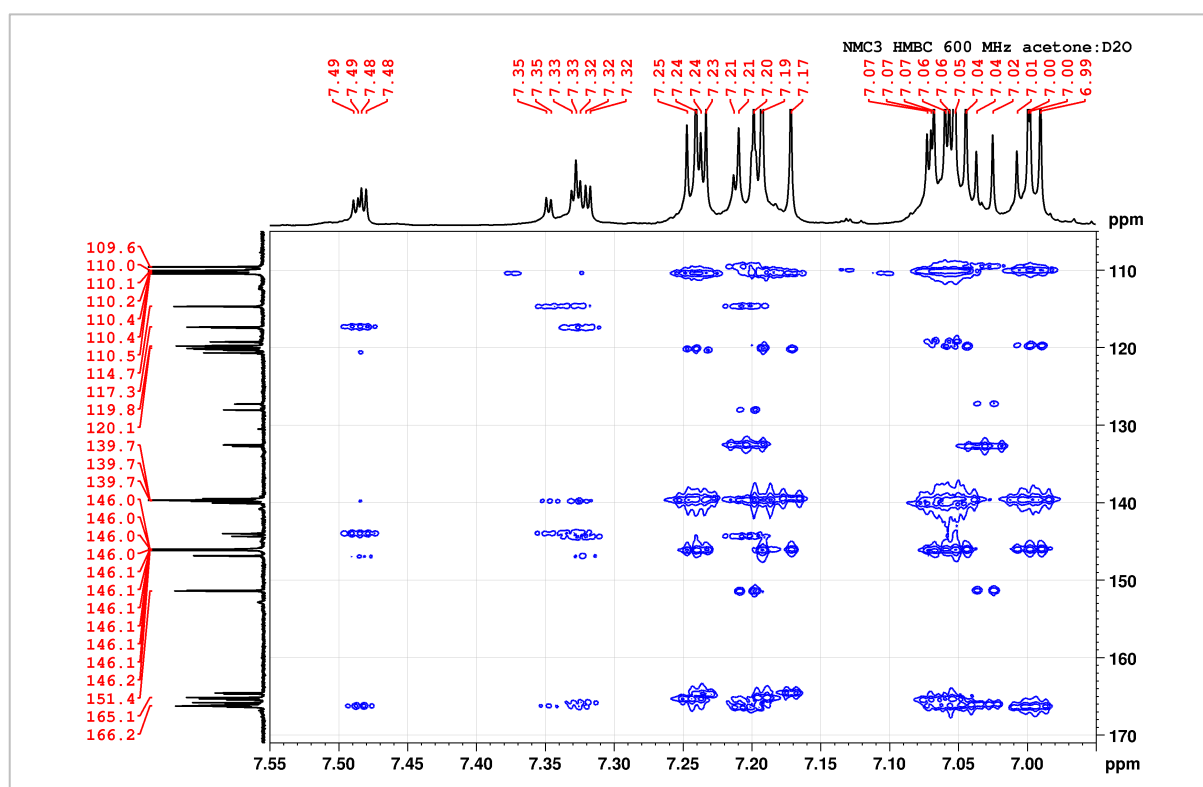

**Figure S42:** Zoom in of the aromatic region of HMBC spectrum of 3,6-bis-O-digalloyl-1,2,4-tri-O-galloyl- $\beta$ -D-glucose (NMC3)
